# Supplementary material for: The proteolytic YB-1 fragment interacts with DNA repair machinery and enhances survival during DNA damaging stress
Source: PubMed Central journal article supplement — Cell Cycle. 2013 Oct 7;12(24):3791–803. doi: 10.4161/cc.26670 (PMC3905071; doi:10.4161/cc.26670), 2013-10-07
Supplement: cc-12-3791-s01.pdf [file cc-12-3791-s01.pdf]

## **Supplemental Material to:**

**Ekaterina R Kim, Anastasiia A Selyutina, Ilya A Buldakov,  
Valentina Evdokimova, Alexey V Sorokin,  
and Lev P Ovchinnikov**

**The proteolytic YB-1 fragment interacts with  
DNA repair machinery and enhances survival during  
DNA-damaging stress**

**Cell Cycle 2013; 12(24)**

**<http://dx.doi.org/10.4161/cc.26670>**

**<http://www.landesbioscience.com/journals/cc/26670/>**

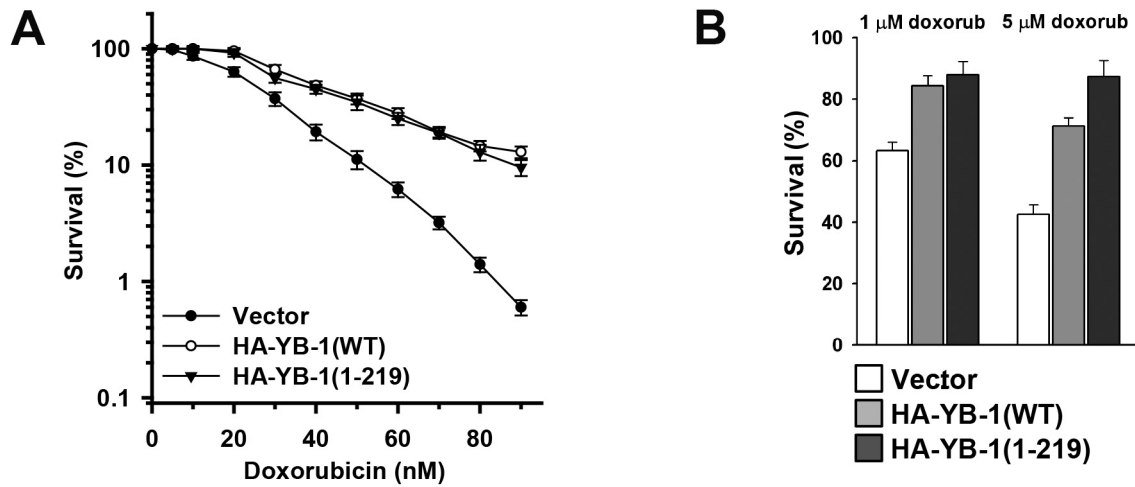

**Supplementary Figure 1.** Effect of full-length and truncated YB-1 proteins on survival of doxorubicin-treated cells. (A) Clonogenic survival assay of NIH3T3 cells stably expressing YB-1 (WT) or YB-1 (1-219) proteins under doxycycline-inducible promoter. Cell lines were treated with increasing concentrations of doxorubicin (0-90 nM) for 14 hours, and the medium was replaced with the regular one. Colonies were left to form for 8 days, fixed in 3.7% paraformaldehyde-PBS, stained with crystal violet, and counted. (B) Cell viability assay was performed as described in Materials and Methods.

**Supplementary Table 1.** List of common genes whose expression was changed in YB-1 (WT) and YB-1 (1-219) expressing NIH3T3 cells compared to vector control cells (>1.75-fold change).

| Gene name | Accession | YB-1 (WT), fold Δ | YB-1 (1-219), fold Δ | Definition                                     | Functional categories                                                                                                                                                                              |
|-----------|-----------|-------------------|----------------------|------------------------------------------------|----------------------------------------------------------------------------------------------------------------------------------------------------------------------------------------------------|
| ALOX5AP   | NM_009663 | -2,24             | -2,23                | arachidonate 5-lipoxygenase activating protein | Metabolism                                                                                                                                                                                         |
| CTGF      | NM_010217 | -1,96             | -1,85                | Connective tissue growth factor                | Protease inhibitor, extracellular matrix, signal transduction, signaling molecule, DNA metabolic process, cell adhesion, cell migration, regulation of cell growth, cellular developmental process |
| CYBA      | NM_007806 | -2,08             | -1,93                | cytochrome b-245, alpha polypeptide            | Electron transport                                                                                                                                                                                 |
| DCN       | NM_007833 | -4,08             | -3,89                | decorin                                        | Extracellular matrix, signal transduction, metabolism, immunity, cation transport, electron transport                                                                                              |
| DLK1      | NM_010052 | -5,65             | -2,16                | delta-like 1 homolog (Drosophila)              | Cell structure and motility, electron transport                                                                                                                                                    |
| GSTM2     | NM_008183 | -2,88             | -1,96                | glutathione S-transferase, mu 2                | Metabolism, response to stress                                                                                                                                                                     |
| GSTT3     | NM_133994 | -3,03             | -3,00                | glutathione S-transferase, theta 3             | Metabolism                                                                                                                                                                                         |
| SDC3      | NM_011520 | -2,41             | -2,06                | syndecan 3                                     | Cytoskeletal                                                                                                                                                                                       |

|         |           |       |       |                                                  |                                                                                                                                                                                                                                |
|---------|-----------|-------|-------|--------------------------------------------------|--------------------------------------------------------------------------------------------------------------------------------------------------------------------------------------------------------------------------------|
|         |           |       |       |                                                  | protein, signaling molecule, cell adhesion, cell structure and motility                                                                                                                                                        |
| SPP1    | NM_009263 | -1,99 | -2,99 | Secreted phosphoprotein 1                        | Extracellular matrix, signaling molecule, response to stress, anti-apoptosis, cell adhesion, regulation of cell proliferation, cell migration, cell structure and motility, protease inhibitor, cellular developmental process |
| AKR1C18 | NM_134066 | 3,17  | 1,92  | aldo-ketoreductase family 1, member C18          | Metabolism, cell structure and motility                                                                                                                                                                                        |
| DHCR24  | NM_053272 | 1,84  | 1,77  | 24-dehydrocholesterol reductase                  | Membrane organization and biogenesis, response to stress, cell cycle arrest, anti-apoptosis, metabolism, translation, cellular developmental process                                                                           |
| ILDR2   | FJ024494  | 5,12  | 2,84  | immunoglobulin-like domain containing receptor 2 | Unknown                                                                                                                                                                                                                        |
| ITGA3   | NM_013565 | 2,14  | 3,23  | Integrin alpha 3                                 | Membrane organization and biogenesis,                                                                                                                                                                                          |

|         |              |       |       |                                             |                                                                                                                |
|---------|--------------|-------|-------|---------------------------------------------|----------------------------------------------------------------------------------------------------------------|
|         |              |       |       |                                             | electron transport, cell adhesion, cell migration, cell structure and motility, cellular developmental process |
| NGEF    | NM_001111314 | 3,83  | 2,18  | neuronal guanine nucleotide exchange factor | Unknown                                                                                                        |
| BLNK    | NM_008528    | 4,88  | -2,62 | B-cell linker                               | Signal transduction, signaling molecule                                                                        |
| CDH5    | NM_009868    | 1,97  | -1,99 | cadherin 5                                  | Signal transduction, metabolism, cation transport, cell adhesion, regulation of cell proliferation             |
| PLP1    | NM_011123    | 1,92  | -2,43 | Proteolipid protein (myelin) 1              | Cell structure and motility, metabolism, translation, cation transport, cellular developmental process         |
| S100A7A | NM_199422    | -2,51 | 2,31  | S100 calcium binding protein A7A            | Unknown                                                                                                        |

**Supplementary Table 2.** List of genes whose expression was changed in YB-1 (1-219) expressing NIH3T3 cells compared to vector control cells (>1.75-fold change).

| Gene name | Accession | YB-1 (1-219), fold $\Delta$ | Definition                                                      | Functional categories                                                                                                                      |
|-----------|-----------|-----------------------------|-----------------------------------------------------------------|--------------------------------------------------------------------------------------------------------------------------------------------|
| ABCG1     | NM_009593 | 2,64                        | ATP-binding cassette, sub-family G (WHITE), member 1            | Metabolism, cation transport, cellular transport                                                                                           |
| AKR1C12   | NM_013777 | -3,19                       | aldo-ketoreductase family 1, member C12                         | Metabolism                                                                                                                                 |
| ALDH3A1   | NM_007436 | -2,69                       | aldehyde dehydrogenase family 3, subfamily A1                   | Metabolism                                                                                                                                 |
| BCL2L1    | NM_009743 | 1,77                        | Bcl2-like 1                                                     | Signaling molecule, anti-apoptosis, metabolism, immunity, cellular developmental process                                                   |
| CCK       | NM_031161 | 2,46                        | cholecystokinin                                                 | Protease inhibitor, signaling molecule, signal transduction, cell migration, translation, cation transport, cellular developmental process |
| ECM1      | NM_007899 | -1,78                       | Extracellular matrix protein 1                                  | Extracellular matrix, signal transduction, immunity                                                                                        |
| IFITM3    | NM_025378 | -2,02                       | Interferon induced transmembrane protein 3                      | Regulation of cell proliferation                                                                                                           |
| IGFBP4    | NM_010517 | 1,87                        | insulin-like growth factor binding protein 4                    | Protease inhibitor, signal transduction, translation, cation transport, regulation of cell growth                                          |
| LPP       | NM_178665 | -1,82                       | LIM domain containing preferred translocation partner in lipoma | Cytoskeletal protein, signal transduction, cell adhesion                                                                                   |
| MFAP5     | NM_015776 | 2,06                        | Microfibrillar associated protein 5                             | Extracellular matrix, cell adhesion, cell                                                                                                  |

|           |           |       |                                                              |                                                                                                 |
|-----------|-----------|-------|--------------------------------------------------------------|-------------------------------------------------------------------------------------------------|
|           |           |       |                                                              | structure and motility                                                                          |
| MSLN      | NM_018857 | 2,54  | mesothelin                                                   | Extracellular matrix, signal transduction, cell adhesion                                        |
| PDGFRA    | NM_011058 | -1,77 | platelet derived growth factor receptor, alpha polypeptide   | Signal transduction, metabolism                                                                 |
| PRELP     | NM_054077 | -4,55 | proline arginine-rich end leucine-rich repeat                | Extracellular matrix, signal transduction                                                       |
| RGS16     | NM_011267 | 2,12  | regulator of G-protein signaling 16                          | Signal transduction                                                                             |
| SCARA3    | NM_172604 | -2,37 | scavenger receptor class A, member 3                         | Signal transduction                                                                             |
| SCARA5    | NM_028903 | -2,63 | scavenger receptor class A, member 5 (putative)              | Cell adhesion, cation transport                                                                 |
| SERPINA3N | NM_009252 | -8,53 | serine (or cysteine) peptidase inhibitor, clade A, member 3N | Protease inhibitor, response to stress                                                          |
| SLURP1    | NM_020519 | -1,87 | secreted Ly6/Plaur domain containing 1                       | Signaling molecule                                                                              |
| SNED1     | NM_172463 | -2,37 | sushi, nidogen and EGF-like domains 1                        | Signaling molecule, signal transduction, cell adhesion, cell structure and motility, metabolism |
| SPON2     | NM_133903 | -2,26 | spondin 2, extracellular matrix protein                      | Extracellular matrix, signal transduction, cell adhesion                                        |
| TXNIP     | NM_023719 | -1,95 | Thioredoxin interacting protein                              | Response to stress, metabolism, translation, cellular developmental process                     |

**Supplementary Table 3.** List of genes whose expression was changed in YB-1 (WT) expressing NIH3T3 cells compared to vector control cells (>1.75-fold change).

| Gene name | Accession    | YB-1 (WT), fold $\Delta$ | Definition                                         | Functional categories                                                                                       |
|-----------|--------------|--------------------------|----------------------------------------------------|-------------------------------------------------------------------------------------------------------------|
| AACS      | NM_030210    | 1,84                     | acetoacetyl-CoA synthetase                         | Protease inhibitor, signal transduction, metabolism                                                         |
| ACAT3     | NM_153151    | 1,82                     | acetyl-Coenzyme A acetyltransferase 3              | Metabolism                                                                                                  |
| ACTA2     | NM_007392    | -7,98                    | actin, alpha 2, smooth muscle, aorta               | Cytoskeletal protein, metabolism, cation transport                                                          |
| ALDH1L2   | NM_153543    | 1,89                     | aldehyde dehydrogenase 1 family, member L2         | Protease inhibitor, metabolism, cation transport                                                            |
| AP1G2     | NM_007455    | 2,65                     | adaptor protein complex AP-1, gamma 2 subunit      | Membrane organization and biogenesis                                                                        |
| BHLHB9    | NM_001098222 | -1,91                    | basic helix-loop-helix domain containing, class B9 | Unknown                                                                                                     |
| BTBD6     | NM_201646    | -2,39                    | BTB (POZ) domain containing 6                      | Extracellular matrix, cation transport                                                                      |
| CCL7      | NM_013654    | -2,26                    | chemokine (C-C motif) ligand 7                     | Signaling molecule, signal transduction, response to stress, cation transport                               |
| CDSN      | NM_001008424 | 5,25                     | corneodesmosin                                     | Metabolism                                                                                                  |
| CEACAM2   | NM_007543    | 1,99                     | CEA-related cell adhesion molecule 2               | Signal transduction, immunity, cellular transport                                                           |
| COL1A1    | NM_007742    | 3,87                     | collagen, type I, alpha 1                          | Extracellular matrix, signal transduction, cell adhesion, cell structure and motility, metabolism, immunity |



|        |           |       |                                                                                |                                                                                                                               |
|--------|-----------|-------|--------------------------------------------------------------------------------|-------------------------------------------------------------------------------------------------------------------------------|
| CXCL1  | NM_008176 | -2,15 | chemokine (C-X-C motif) ligand 1                                               | Signaling molecule, signal transduction, response to stress, cation transport                                                 |
| CYP51  | NM_020010 | 2,21  | cytochrome P450, family 51                                                     | Metabolism, electron transport, cellular transport                                                                            |
| CYR61  | NM_010516 | -1,84 | Cysteine rich protein 61                                                       | Signaling molecule, signal transduction, cell adhesion, regulation of cell growth                                             |
| DAAM1  | NM_172464 | -1,88 | dishevelled associated activator of morphogenesis 1                            | Cytoskeletal protein, cell structure and motility                                                                             |
| DDIT3  | NM_007837 | 1,80  | DNA-damage inducible transcript 3                                              | Signaling molecule, response to stress, cell cycle arrest, cellular developmental process                                     |
| DDX24  | NM_020494 | -1,79 | DEAD (Asp-Glu-Ala-Asp) box polypeptide 24                                      | Immunity                                                                                                                      |
| EFEMP2 | NM_021474 | -2,89 | epidermal growth factor-containing fibulin-like extracellular matrix protein 2 | Extracellular matrix, signaling molecule, signal transduction, response to stress, cell adhesion, cell structure and motility |
| ENO2   | NM_013509 | -3,48 | enolase 2, gamma neuronal                                                      | Metabolism, cation transport                                                                                                  |
| FDPS   | NM_134469 | 1,94  | Farnesyl diphosphate synthetase                                                | Metabolism                                                                                                                    |
| FGFR2  | NM_201601 | -1,92 | Fibroblast growth factor receptor 2                                            | Regulation of cell proliferation, cellular developmental process                                                              |
| FLT1   | NM_010228 | 1,81  | FMS-like tyrosine                                                              | Immunity, electron                                                                                                            |

|            |              |       |                                                            |                                                                                               |
|------------|--------------|-------|------------------------------------------------------------|-----------------------------------------------------------------------------------------------|
|            |              |       | kinase 1                                                   | transport, cell migration, cellular developmental process                                     |
| GADD45A    | NM_007836    | 1,83  | growth arrest and DNA-damage-inducible 45 alpha            | Response to stress, cell cycle arrest                                                         |
| GKN1       | NM_025466    | 1,97  | gastrokine 1                                               | Metabolism, translation, cation transport, regulation of cell proliferation                   |
| HDAC5      | NM_001077696 | 1,88  | histone deacetylase 5                                      | DNA metabolic process                                                                         |
| HIST1H2AF  | NM_175661    | -1,80 | Histone cluster 1, H2af                                    | DNA metabolic process, cation transport, protease inhibitor                                   |
| HIST1H2AH  | NM_175659    | -2,00 | Histone cluster 1, H2ah                                    | DNA metabolic process                                                                         |
| HIST1H2AK  | NM_178183    | -1,84 | Histone cluster 1, H2ak                                    | DNA metabolic process, cation transport, protease inhibitor                                   |
| HIST1H2AN  | NM_178184    | -1,87 | Histone cluster 1, H2an                                    | DNA metabolic process, cation transport, protease inhibitor, translation                      |
| HIST2H2AA2 | NM_178212    | -1,76 | Histone cluster 2, H2aa2                                   | DNA metabolic process                                                                         |
| HSP90AA1   | NM_010480    | -1,96 | heat shock protein 90, alpha (cytosolic), class A member 1 | Response to stress, metabolism, translation, cation transport, cellular developmental process |
| ITGBL1     | NM_145467    | 1,75  | integrin, beta-like 1                                      | Cell adhesion, cellular transport                                                             |
| KPRP       | NM_028629    | -2,89 | Keratinocyte expressed, proline-rich                       | Unknown                                                                                       |
| KRT13      | NM_010662    | 2,63  | keratin 13                                                 | Cytoskeletal protein, cell                                                                    |

|        |           |       |                                               |                                                                                                                            |
|--------|-----------|-------|-----------------------------------------------|----------------------------------------------------------------------------------------------------------------------------|
|        |           |       |                                               | adhesion, cell structure and motility                                                                                      |
| LBCL1  | NM_008487 | 2,08  | rho/rac guanine nucleotide exchange factor    | Metabolism, immunity, cation transport, regulation of cell proliferation, cell structure and motility                      |
| LIMS2  | NM_144862 | 2,20  | LIM and senescent cell antigen like domains 2 | Cytoskeletal protein, protease inhibitor, signal transduction                                                              |
| LIP1   | NM_021460 | -2,25 | Lysosomal acid lipase A                       | Metabolism                                                                                                                 |
| LOXL4  | NM_053083 | -3,51 | lysyl oxidase-like 4                          | Signaling molecule, protease inhibitor, cell adhesion                                                                      |
| MEF2C  | NM_025282 | 1,92  | Myocyte enhancer factor 2C                    | Immunity, cellular developmental process                                                                                   |
| MT-ND5 | BC055066  | 1,81  | Mitochondrially encoded NADH dehydrogenase 5  | Electron transport                                                                                                         |
| NEO1   | NM_008684 | 2,24  | neogenin                                      | Membrane organization and biogenesis, signal transduction, cation transport, cell adhesion, cellular developmental process |
| NNMT   | NM_010924 | -1,88 | nicotinamide N-methyl transferase             | Cation transport                                                                                                           |
| OSR1   | NM_011859 | -1,78 | odd-skipped related 1 (Drosophila)            | Electron transport                                                                                                         |
| PDLIM2 | NM_145978 | -2,23 | PDZ and LIM domain 2                          | Cytoskeletal protein, cell structure and motility                                                                          |
| RCOR1  | NM_198023 | -1,95 | REST corepressor 1                            | DNA metabolic process                                                                                                      |
| SDPR   | NM_138741 | -1,86 | Serum deprivation                             | Metabolism                                                                                                                 |

|           |           |       |                                                                           |                                                                                                                 |
|-----------|-----------|-------|---------------------------------------------------------------------------|-----------------------------------------------------------------------------------------------------------------|
|           |           |       | response                                                                  |                                                                                                                 |
| SERPINA1B | NM_009244 | -4,99 | serine (or cysteine) peptidase inhibitor, clade A, member 1b              | Protease inhibitor, response to stress, electron transport                                                      |
| SERPINA1D | NM_009246 | -2,35 | serine (or cysteine) peptidase inhibitor, clade A, member 1d              | Protease inhibitor                                                                                              |
| SLC25A33  | NM_027460 | 1,83  | Solute carrier family 25, member 33                                       | Cellular transport                                                                                              |
| SLC6A9    | NM_008135 | 2,45  | solute carrier family 6 (neurotransmitter transporter, glycine), member 9 | Cellular transport                                                                                              |
| STARD4    | NM_133774 | 1,75  | StAR-related lipid transfer domain containing 4                           | Metabolism                                                                                                      |
| STOM      | NM_013515 | 2,05  | stomatin                                                                  | Cytoskeletal protein, cell structure and motility, immunity, translation                                        |
| TINAGL    | NM_023476 | 2,76  | Tubulointerstitial nephritis antigen-like                                 | Immunity, cell adhesion                                                                                         |
| TK1       | NM_009387 | -1,78 | Thymidine kinase 1                                                        | Protease inhibitor, cell structure and motility, signal transduction, DNA metabolic process, electron transport |
| TNNT2     | NM_011619 | 1,92  | troponin T2, cardiac                                                      | Cytoskeletal protein, cellular developmental process                                                            |
| VLDLR     | NM_013703 | -3,29 | very low density lipoprotein receptor                                     | Membrane organization and biogenesis, metabolism                                                                |

**Supplementary Table 4.** List of genes whose expression was changed in YB-1 (WT) expressing NIH3T3 cells compared to vector control cells

| <b>Gene Name</b>                                                                              | <b>Symbol</b> | <b>Fold Change (YB-1 (WT) VS Ctrl.)</b> |
|-----------------------------------------------------------------------------------------------|---------------|-----------------------------------------|
| expressed sequence AA536749                                                                   | AA536749      | 0.803408917                             |
| acetoacetyl-CoA synthetase                                                                    | AACS          | 1.841224934                             |
| alanyl-tRNA synthetase domain containing 1                                                    | AARSD1        | 0.843652261                             |
| ATP-binding cassette, sub-family A, member 3                                                  | ABCA3         | 1.394461526                             |
| ATP-binding cassette, sub-family D, member 4                                                  | ABCD4         | 0.655626663                             |
| abhydrolase domain containing 5                                                               | ABHD5         | 1.398745548                             |
| acetyl-Coenzyme A acetyltransferase 2                                                         | ACAT2         | 1.429258295                             |
| acetyl-Coenzyme A acetyltransferase 3                                                         | ACAT3         | 1.820257559                             |
| acetyl-Coenzyme A acetyltransferase 3                                                         | ACAT3         | 1.369422194                             |
| acyl-CoA synthetase short-chain family member 2                                               | ACSS2         | 1.360615241                             |
| actin, alpha 2, smooth muscle, aorta                                                          | ACTA2         | 0.251326512                             |
| actin, alpha 2, smooth muscle, aorta                                                          | ACTA2         | 0.12523977                              |
| actinin, alpha 1                                                                              | ACTN1         | 0.718521202                             |
| a disintegrin and metallopeptidase domain 15                                                  | ADAM15        | 1.359479838                             |
| a disintegrin-like and metallopeptidase (reprolysin type) with thrombospondin type 1 motif, 7 | ADAMTS7       | 1.572671322                             |
| ADAMTS-like 5                                                                                 | ADAMTSL5      | 1.230996139                             |
| aarF domain containing kinase 1                                                               | ADCK1         | 0.68784532                              |
| adipose differentiation related protein                                                       | ADFP          | 1.30348435                              |
| amino-terminal enhancer of split                                                              | AES           | 1.550202939                             |
| agrin                                                                                         | AGRN          | 1.704892239                             |
| AT hook containing transcription factor 1                                                     | AHCTF1        | 0.81030777                              |
| S-adenosylhomocysteine hydrolase-like 1                                                       | AHCYL1        | 0.700732294                             |
| AHNAK nucleoprotein                                                                           | AHNAK         | 1.297679496                             |
| AHNAK nucleoprotein 2                                                                         | AHNAK2        | 0.755459009                             |
| AHA1, activator of heat shock protein ATPase homolog 1                                        | AHSA1         | 0.577909896                             |
| expressed sequence AI481316                                                                   | AI481316      | 0.701832673                             |
| expressed sequence AI846148                                                                   | AI846148      | 1.287050628                             |
| aryl-hydrocarbon receptor-interacting protein                                                 | AIP           | 1.174241759                             |
| aldo-keto reductase family 1, member C12                                                      | AKR1C12       | 1.542663609                             |
| aldo-keto reductase family 1, member C18                                                      | AKR1C18       | 3.169006056                             |
| aldehyde dehydrogenase 1 family, member L2                                                    | ALDH1L2       | 1.893193272                             |
| arachidonate 5-lipoxygenase-activating protein                                                | ALOX5AP       | 0.447033972                             |
| autocrine motility factor receptor                                                            | AMFR          | 1.176444561                             |
| AMP deaminase 3                                                                               | AMPD3         | 0.79400639                              |
| anaphase-promoting complex subunit 5                                                          | ANAPC5        | 1.179496497                             |
| anaphase-promoting complex subunit 5                                                          | ANAPC5        | 1.210120182                             |
| angel homolog 2                                                                               | ANGEL2        | 1.248033686                             |
| angiopoietin-like 2                                                                           | ANGPTL2       | 1.59289998                              |
| angiopoietin-like 4                                                                           | ANGPTL4       | 0.607816407                             |
| angiopoietin-like 6                                                                           | ANGPTL6       | 1.484458716                             |

|                                                                                    |          |             |
|------------------------------------------------------------------------------------|----------|-------------|
| ankyrin repeat and MYND domain containing 2                                        | ANKMY2   | 1.171867921 |
| ankyrin repeat domain 13b                                                          | ANKRD13B | 1.400934587 |
| ankyrin repeat and sterile alpha motif domain containing 3                         | ANKS3    | 1.225545296 |
| adaptor protein complex AP-1, gamma 2 subunit                                      | AP1G2    | 2.653076527 |
| amyloid beta (A4) precursor-like protein 2                                         | APLP2    | 1.309840541 |
| aquaporin 1                                                                        | AQP1     | 1.257566138 |
| ADP-ribosylation factor 6                                                          | ARF6     | 0.686957954 |
| Rho GTPase activating protein 24                                                   | ARHGAP24 | 0.810198762 |
| ariadne homolog 2                                                                  | ARIH2    | 1.259320479 |
| ADP-ribosylation factor-like 6 interacting protein 5                               | ARL6IP5  | 1.201088058 |
| armadillo repeat containing, X-linked 2                                            | ARMCX2   | 0.714818974 |
| arrestin domain containing 4                                                       | ARRDC4   | 0.615456438 |
| arsA (bacterial) arsenite transporter, ATP-binding, homolog 1                      | ASNA1    | 1.534390728 |
| additional sex combs like 2                                                        | ASXL2    | 1.705454095 |
| activating transcription factor 4                                                  | ATF4     | 1.26254142  |
| activating transcription factor 5                                                  | ATF5     | 1.241217045 |
| ATG2 autophagy related 2 homolog A                                                 | ATG2A    | 1.594932977 |
| ATG2 autophagy related 2 homolog B                                                 | ATG2B    | 0.731839814 |
| 5-aminoimidazole-4-carboxamide ribonucleotide formyltransferase/IMP cyclohydrolase | ATIC     | 0.81238027  |
| ATPase, Na <sup>+</sup> /K <sup>+</sup> transporting, alpha 1 polypeptide          | ATP1A1   | 1.290617842 |
| ATPase, H <sup>+</sup> transporting, lysosomal accessory protein 1                 | ATP6AP1  | 1.250045129 |
| ATPase, H <sup>+</sup> transporting, lysosomal V0 subunit B                        | ATP6V0B  | 1.550997225 |
| ATPase, H <sup>+</sup> transporting, lysosomal V0 subunit D1                       | ATP6V0D1 | 1.317289744 |
| ATPase, H <sup>+</sup> transporting, lysosomal V0 subunit E2                       | ATP6V0E2 | 1.340033215 |
| ATPase, H <sup>+</sup> transporting, lysosomal V1 subunit B2                       | ATP6V1B2 | 1.258227452 |
| ATPase, H <sup>+</sup> transporting, lysosomal V1 subunit C1                       | ATP6V1C1 | 1.268771367 |
| VATPase, H <sup>+</sup> transporting, lysosomal V1 subunit E1                      | ATP6V1E1 | 1.158300742 |
| expressed sequence AU021838                                                        | AU021838 | 1.414645602 |
| expressed sequence AU040320                                                        | AU040320 | 1.355882473 |
| arginine vasopressin-induced 1                                                     | AVP1     | 1.367789898 |
| axin 1                                                                             | AXIN1    | 0.84286294  |
| beta-2 microglobulin                                                               | B2M      | 1.221703343 |
| beta-1,4-N-acetyl-galactosaminyl transferase 1                                     | B4GALNT1 | 1.506914819 |
| cDNA sequence BC002230                                                             | BC002230 | 0.736947252 |
| cDNA sequence BC008155                                                             | BC008155 | 1.349167579 |
| cDNA sequence BC018399                                                             | BC018399 | 0.786903963 |
| cDNA sequence BC021381                                                             | BC021381 | 1.345057184 |
| cDNA sequence BC021395                                                             | BC021395 | 0.736807512 |
| cDNA sequence BC025076                                                             | BC025076 | 0.746337092 |
| cDNA sequence BC031353                                                             | BC031353 | 1.530660644 |
| cDNA sequence BC031853                                                             | BC031853 | 1.555926337 |
| cDNA sequence BC064033                                                             | BC064033 | 1.686450246 |
| breast carcinoma amplified sequence 3                                              | BCAS3    | 1.324281302 |

|                                                                                                           |          |             |
|-----------------------------------------------------------------------------------------------------------|----------|-------------|
| Bcl2-like 1                                                                                               | BCL2L1   | 1.37655088  |
| B-cell leukemia/lymphoma 6                                                                                | BCL6     | 0.686689145 |
| B-cell CLL/lymphoma 9-like                                                                                | BCL9L    | 1.42232857  |
| 3-hydroxybutyrate dehydrogenase, type 2                                                                   | BDH2     | 0.784672772 |
| biglycan                                                                                                  | BGN      | 0.589355001 |
| basic helix-loop-helix domain containing, class B9                                                        | BHLHB9   | 0.523402225 |
| bladder cancer associated protein homolog (human)                                                         | BLCAP    | 1.291381782 |
| B-cell linker                                                                                             | BLNK     | 4.876116465 |
| bromodomain containing 2                                                                                  | BRD2     | 1.187115404 |
| BRF1 homolog, subunit of RNA polymerase III transcription initiation factor IIIB ( <i>S. cerevisiae</i> ) | BRF1     | 0.781193103 |
| BSD domain containing 1                                                                                   | BSDC1    | 1.240026645 |
| BTB (POZ) domain containing 6                                                                             | BTBD6    | 0.419208249 |
| expressed sequence C77080                                                                                 | C77080   | 1.406917654 |
| calumenin                                                                                                 | CALU     | 1.197175216 |
| adenylate cyclase-associated protein 1                                                                    | CAP1     | 1.234842915 |
| capping protein                                                                                           | CAPG     | 1.213925771 |
| calpain 2                                                                                                 | CAPN2    | 0.822562934 |
| calpain 5                                                                                                 | CAPN5    | 1.499598591 |
| carbonyl reductase 1                                                                                      | CBR1     | 1.513825299 |
| coiled-coil domain containing 131                                                                         | CCDC131  | 1.22311465  |
| coiled-coil domain containing 56                                                                          | CCDC56   | 0.828823614 |
| coiled-coil domain containing 85B                                                                         | CCDC85B  | 0.725256201 |
| chemokine (C-C motif) ligand 2                                                                            | CCL2     | 0.623794877 |
| chemokine (C-C motif) ligand 7                                                                            | CCL7     | 0.443079176 |
| cyclin E1                                                                                                 | CCNE1    | 0.59484264  |
| cyclin G1                                                                                                 | CCNG1    | 0.703344918 |
| CD109 antigen                                                                                             | CD109    | 1.222392249 |
| CD151 antigen                                                                                             | CD151    | 1.202009664 |
| CD 81 antigen (Cd81).                                                                                     | CD81     | 1.233097361 |
| CD9 antigen (Cd9).                                                                                        | CD9      | 1.339976167 |
| Cd99 antigen-like 2 (Cd99I2).                                                                             | CD99L2   | 1.323757298 |
| cytidine deaminase (Cda).                                                                                 | CDA      | 0.666785884 |
| CDC42 effector protein (Rho GTPase binding)                                                               | CDC42EP5 | 0.644479689 |
| CDC42 small effector 1                                                                                    | CDC42SE1 | 1.199655071 |
| cell division cycle 7                                                                                     | CDC7     | 0.777575804 |
| cell division cycle associated 4                                                                          | CDCA4    | 0.703248746 |
| cadherin 5, type 2 (vascular endothelium)                                                                 | CDH5     | 1.967519083 |
| cyclin-dependent kinase inhibitor 3,                                                                      | CDKN3    | 0.775899112 |
| cerebellar degeneration-related protein 2-like                                                            | CDR2L    | 1.411136569 |
| corneodesmosin                                                                                            | CDSN     | 5.250549138 |
| CEA-related cell adhesion molecule 2                                                                      | CEACAM2  | 1.993265085 |
| CCAAT/enhancer binding protein (C/EBP), beta                                                              | CEBPB    | 1.146212771 |
| centrosomal protein 170                                                                                   | CEP170   | 0.708482326 |

|                                                                                     |            |             |
|-------------------------------------------------------------------------------------|------------|-------------|
| centrosomal protein 63                                                              | CEP63      | 0.807824418 |
| ChaC, cation transport regulator-like 1                                             | CHAC1      | 1.511855244 |
| choline kinase beta                                                                 | CHKB       | 1.254148188 |
| chromatin modifying protein 4B                                                      | CHMP4B     | 1.400766391 |
| Cbp/p300-interacting transactivator, with Glu/Asp-rich carboxy-terminal domain, 2   | CITED2     | 0.606760658 |
| CAP-GLY domain containing linker protein 1                                          | CLIP1      | 0.740051422 |
| claspin homolog (Xenopus laevis)                                                    | CLSPN      | 0.628244045 |
| cornichon homolog 4 (Drosophila)                                                    | CNIH4      | 0.840297133 |
| CCR4-NOT transcription complex, subunit 10                                          | CNOT10     | 1.28914691  |
| cordon-bleu                                                                         | COBL       | 1.613363135 |
| collagen, type XVI, alpha 1                                                         | COL16A1    | 1.296505514 |
| collagen, type I, alpha 1                                                           | COL1A1     | 3.865943564 |
| procollagen, type IV, alpha 1                                                       | COL4A1     | 1.446499613 |
| procollagen, type V, alpha 1                                                        | COL5A1     | 0.755098583 |
| procollagen, type VI, alpha 1                                                       | COL6A1     | 1.239542233 |
| procollagen, type VI, alpha 2                                                       | COL6A2     | 1.365543019 |
| procollagen, type VIII, alpha 1                                                     | COL8A1     | 0.636179649 |
| COMM domain containing 10                                                           | COMMD10    | 1.351139479 |
| catechol-O-methyltransferase                                                        | COMT       | 1.183363578 |
| coatamer protein complex, subunit epsilon                                           | COPE       | 1.156569774 |
| coatamer protein complex, subunit zeta 2                                            | COPZ2      | 0.734541184 |
| coenzyme Q6 homolog (yeast)                                                         | COQ6       | 0.731241426 |
| cytochrome c oxidase, subunit VI a, polypeptide 2                                   | COX6A2     | 1.660502717 |
| cytochrome c oxidase, subunit VIc                                                   | COX6C      | 0.69460059  |
| carboxypeptidase E                                                                  | CPE        | 1.275793182 |
| cytokine receptor-like factor 1                                                     | CRLF1      | 1.361013911 |
| crystallin, lambda 1                                                                | CRYL1      | 0.586885011 |
| colony stimulating factor 1                                                         | CSF1       | 0.73704922  |
| chondroitin sulfate N-acetylgalactosaminyltransferase 1                             | CSGALNACT1 | 0.739252866 |
| chondroitin sulfate proteoglycan 4                                                  | CSPG4      | 1.379000856 |
| CTAGE family, member 5                                                              | CTAGE5     | 1.482201814 |
| CTD (carboxy-terminal domain, RNA polymerase II, polypeptide A) small phosphatase 2 | CTDSP2     | 1.288864953 |
| connective tissue growth factor                                                     | CTGF       | 0.511201272 |
| catenin (cadherin associated protein), alpha-like 1                                 | CTNNAL1    | 0.725995678 |
| catenin beta interacting protein 1                                                  | CTNNBIP1   | 1.250010488 |
| cathepsin A                                                                         | CTSA       | 1.345308906 |
| cullin 7                                                                            | CUL7       | 0.692727581 |
| chemokine (C-X-C motif) ligand 1                                                    | CXCL1      | 0.466175257 |
| CAAX box 1 homolog A (human)                                                        | CXX1A      | 0.834420077 |
| cytochrome b-5                                                                      | CYB5       | 0.836893916 |
| cytochrome b-561                                                                    | CYB561     | 1.346211171 |
| cytochrome b5 reductase 3                                                           | CYB5R3     | 1.351425238 |
| cytochrome b5 reductase 3                                                           | CYB5R3     | 1.402163808 |



|                                                                                |          |             |
|--------------------------------------------------------------------------------|----------|-------------|
| cytochrome b-245, alpha polypeptide                                            | CYBA     | 0.481630533 |
| cytochrome P450, family 26, subfamily b, polypeptide 1                         | CYP26B1  | 0.75045743  |
| cytochrome P450, family 51                                                     | CYP51    | 2.211898087 |
| cytochrome P450, family 51                                                     | CYP51    | 1.870900329 |
| cysteine rich protein 61                                                       | CYR61    | 0.543137352 |
| D0KIST3                                                                        | D0KIST3  | 1.633869386 |
| dishevelled associated activator of morphogenesis 1                            | DAAM1    | 0.661582012 |
| aspartyl-tRNA synthetase                                                       | DARS     | 0.783792489 |
| DBF4 homolog (S. cerevisiae)                                                   | DBF4     | 1.422613198 |
| dysbindin (dystrobrevin binding protein 1) domain containing 2                 | DBNDD2   | 1.394143451 |
| decorin                                                                        | DCN      | 0.511881501 |
| dCMP deaminase                                                                 | DCTD     | 0.643338339 |
| dynactin 1                                                                     | DCTN1    | 1.339681465 |
| dynactin 2                                                                     | DCTN2    | 1.263121785 |
| damage specific DNA binding protein 1                                          | DDB1     | 1.207867908 |
| DNA-damage inducible transcript 3                                              | DDIT3    | 1.799001445 |
| DEAD (Asp-Glu-Ala-Asp) box polypeptide 24                                      | DDX24    | 0.559168279 |
| DEAD (Asp-Glu-Ala-Asp) box polypeptide 26                                      | DDX26    | 0.781456591 |
| DEAD (Asp-Glu-Ala-Asp) box polypeptide 49                                      | DDX49    | 1.384887432 |
| DEAD (Asp-Glu-Ala-Asp) box polypeptide 6                                       | DDX6     | 0.683546445 |
| 24-dehydrocholesterol reductase                                                | DHCR24   | 1.835623581 |
| 7-dehydrocholesterol reductase                                                 | DHCR7    | 1.445059645 |
| diablo homolog (Drosophila)                                                    | DIABLO   | 1.357751022 |
| diaphanous homolog 3 (Drosophila)                                              | DIAP3    | 0.804907104 |
| Dicer1, Dcr-1 homolog (Drosophila)                                             | DICER1   | 0.655551798 |
| dihydrolipoamide dehydrogenase                                                 | DLD      | 1.214510765 |
| delta-like 1 homolog (Drosophila)                                              | DLK1     | 0.21174513  |
| dynein, axonemal, heavy chain 11                                               | DNAHC11  | 0.629897245 |
| dynein, cytoplasmic 1, intermediate chain 2                                    | DNCIC2   | 0.665752433 |
| dynamamin 3, opposite strand (Dnm3os) on chromosome 1                          | DNM3OS   | 0.661790045 |
| developmental pluripotency associated 4                                        | DPPA4    | 1.233537144 |
| dihydropyrimidinase-like 2                                                     | DPYSL2   | 1.150764755 |
| dihydropyrimidinase-like 3                                                     | DPYSL3   | 0.82671628  |
| dystrobrevin alpha                                                             | DTNA     | 0.733374649 |
| deoxythymidylate kinase (thymidylate kinase)                                   | DTYMK    | 0.71344006  |
| dual specificity phosphatase 1                                                 | DUSP1    | 0.670364654 |
| dynein, cytoplasmic 1 light intermediate chain 2                               | DYNC1LI2 | 1.255783558 |
| endothelin converting enzyme 1                                                 | ECE1     | 1.405478256 |
| enoyl Coenzyme A hydratase, short chain, 1                                     | ECHS1    | 1.385574283 |
| endothelin 1                                                                   | EDN1     | 0.597387428 |
| epidermal growth factor-containing fibulin-like extracellular matrix protein 2 | EFEMP2   | 0.346011254 |
| ephrin A1                                                                      | EFNA1    | 1.380879182 |
| predicted gene, EG433229, transcript variant 7                                 | EG433229 | 0.624905601 |

|                                                              |          |             |
|--------------------------------------------------------------|----------|-------------|
| predicted gene, EG433865                                     | EG433865 | 1.486097951 |
| predicted gene, EG545886                                     | EG545886 | 1.245227477 |
| predicted gene, EG633640                                     | EG633640 | 0.663906133 |
| predicted gene, EG667728                                     | EG667728 | 0.740672031 |
| predicted gene, EG667728                                     | EG667728 | 0.739009081 |
| EH domain binding protein 1-like 1                           | EHBP1L1  | 1.386437302 |
| EH-domain containing 1                                       | EHD1     | 1.491406291 |
| eukaryotic translation initiation factor 1B                  | EIF1B    | 0.822817135 |
| eukaryotic translation initiation factor 2B, subunit 3 gamma | EIF2B3   | 0.84502896  |
| ELK3, member of ETS oncogene family                          | ELK3     | 0.787319091 |
| elongation of very long chain fatty acids like 1             | ELOVL1   | 1.392565993 |
| ELOVL family member 5, elongation of long chain fatty acids  | ELOVL5   | 1.262388211 |
| ELOVL family member 6, elongation of long chain fatty acids  | ELOVL6   | 1.31832487  |
| EMG1 nucleolar protein homolog (S. cerevisiae)               | EMG1     | 0.811319922 |
| echinoderm microtubule associated protein like 1             | EML1     | 0.613099743 |
| epithelial membrane protein 2                                | EMP2     | 1.416890003 |
| ectodermal-neural cortex 1                                   | ENC1     | 0.614380648 |
| enolase 2, gamma neuronal                                    | ENO2     | 0.287685496 |
| enolase 3, beta muscle                                       | ENO3     | 0.621199304 |
| ectonucleoside triphosphate diphosphohydrolase 7             | ENTPD7   | 1.307362506 |
| ERGIC and golgi 3                                            | ERGIC3   | 1.47757402  |
| ERBB receptor feedback inhibitor 1                           | ERRFI1   | 0.716295429 |
| electron transferring flavoprotein, beta polypeptide         | ETFB     | 0.829924288 |
| ets variant gene 4 (E1A enhancer binding protein, E1AF)      | ETV4     | 1.362444779 |
| enhancer of zeste homolog 2 (Drosophila)                     | EZH2     | 0.763722294 |
| fatty acid desaturase 2                                      | FADS2    | 1.296837329 |
| fatty acid desaturase 3                                      | FADS3    | 1.355009619 |
| fumarylacetoacetate hydrolase                                | FAH      | 0.809745979 |
| FERM, RhoGEF and pleckstrin domain protein 2                 | FARP2    | 0.685696281 |
| phenylalanine-tRNA synthetase 2 (mitochondrial)              | FARS2    | 1.264051908 |
| F-box and WD-40 domain protein 9                             | FBXW9    | 1.374866324 |
| farnesyl diphosphate synthetase                              | FDPS     | 1.424903645 |
| fasciculation and elongation protein zeta 1                  | FEZ1     | 0.81378431  |
| fibroblast growth factor receptor 2                          | FGFR2    | 0.521029275 |
| four and a half LIM domains 2                                | FHL2     | 0.720879944 |
| four and a half LIM domains 3                                | FHL3     | 1.610120703 |
| FK506 binding protein 10                                     | FKBP10   | 1.241411496 |
| FK506 binding protein 11                                     | FKBP11   | 0.669277188 |
| filamin, alpha                                               | FLNA     | 1.298737046 |
| filamin, beta                                                | FLNB     | 0.731529521 |
| fibronectin leucine rich transmembrane protein 2             | FLRT2    | 0.63831018  |
| FMS-like tyrosine kinase 1                                   | FLT1     | 1.807229851 |
| fibronectin 1                                                | FN1      | 0.741631868 |

|                                                                                   |           |             |
|-----------------------------------------------------------------------------------|-----------|-------------|
| FERM domain containing 6                                                          | FRMD6     | 0.581352984 |
| fascin homolog 1, actin bundling protein ( <i>Strongylocentrotus purpuratus</i> ) | FSCN1     | 1.584286723 |
| follistatin-like 1                                                                | FSTL1     | 0.708242451 |
| fat mass and obesity associated                                                   | FTO       | 0.661560551 |
| FXYD domain-containing ion transport regulator 5                                  | FXYD5     | 1.239627161 |
| frizzled homolog 7 ( <i>Drosophila</i> )                                          | FZD7      | 1.300936685 |
| glucose-6-phosphate dehydrogenase X-linked                                        | G6PDX     | 1.280389471 |
| gamma-aminobutyric acid receptor-associated protein-like 1                        | GABARAPL1 | 1.204749624 |
| growth arrest and DNA-damage-inducible 45 alpha                                   | GADD45A   | 1.834664878 |
| cyclin G associated kinase                                                        | GAK       | 1.375219321 |
| phosphoribosylglycinamide formyltransferase                                       | GART      | 0.621293275 |
| GATA zinc finger domain containing 1                                              | GATAD1    | 1.247479254 |
| glutamate-cysteine ligase, modifier subunit                                       | GCLM      | 1.326026896 |
| glycerophosphodiester phosphodiesterase domain containing 1                       | GDPD1     | 1.532476702 |
| gem (nuclear organelle) associated protein 4                                      | GEMIN4    | 0.806885013 |
| gap junction membrane channel protein alpha 1                                     | GJA1      | 0.659878659 |
| gastrokine 1                                                                      | GKN1      | 1.97366804  |
| glucuronyl C5-epimerase                                                           | GLCE      | 1.518072205 |
| glutaredoxin 5 homolog ( <i>S. cerevisiae</i> )                                   | GLRX5     | 0.653164345 |
| glycolipid transfer protein                                                       | GLTP      | 1.241084669 |
| gene model 773                                                                    | GM773     | 0.179954814 |
| guanine nucleotide binding protein (G protein), alpha inhibiting 2                | GNAI2     | 1.269350909 |
| glucosamine-6-phosphate deaminase 2                                               | GNPDA2    | 0.649430724 |
| golgi integral membrane protein 4                                                 | GOLIM4    | 1.260382507 |
| golgi membrane protein 1                                                          | GOLM1     | 1.227134382 |
| glycoprotein Ib, beta polypeptide                                                 | GP1BB     | 1.439395159 |
| glypican 1                                                                        | GPC1      | 1.282160041 |
| glycoprotein (transmembrane) nmb                                                  | GPNMB     | 1.231130473 |
| G protein-coupled receptor 149                                                    | GPR149    | 0.66768735  |
| glycoprotein, synaptic 2                                                          | GPSN2     | 1.614589645 |
| glutamic pyruvate transaminase 2                                                  | GPT2      | 1.694800733 |
| glutathione peroxidase 1                                                          | GPX1      | 1.503607719 |
| granulin                                                                          | GRN       | 1.536576456 |
| germ cell-specific gene 2                                                         | GSG2      | 0.775712338 |
| G1 to S phase transition 1                                                        | GSPT1     | 0.830955972 |
| glutathione S-transferase, mu 2                                                   | GSTM2     | 0.346728724 |
| glutathione S-transferase, theta 3                                                | GSTT3     | 0.329945005 |
| general transcription factor II I                                                 | GTF2I     | 0.684880944 |
| GTP binding protein 2                                                             | GTPBP2    | 1.689797881 |
| H2-K region expressed gene 6                                                      | H2-KE6    | 0.704878543 |
| histocompatibility 2, T region locus 18                                           | H2-T18    | 1.26175273  |
| histocompatibility 60a                                                            | H60A      | 0.714067563 |
| hydroxyacyl glutathione hydrolase                                                 | HAGH      | 1.660513532 |

|                                                             |            |             |
|-------------------------------------------------------------|------------|-------------|
| hyaluronan synthase 2                                       | HAS2       | 0.665672981 |
| hemoglobin Z, beta-like embryonic chain                     | HBB-BH1    | 1.714333687 |
| HMG-box transcription factor 1                              | HBP1       | 1.700393865 |
| histone deacetylase 5                                       | HDAC5      | 1.882436696 |
| hairy and enhancer of split 6                               | HES6       | 1.319440439 |
| huntingtin interacting protein 1                            | HIP1       | 1.359968271 |
| huntingtin interacting protein 1 related                    | HIP1R      | 1.306329418 |
| HIRA interacting protein 3                                  | HIRIP3     | 0.776175466 |
| histone cluster 1, H2ad                                     | HIST1H2AD  | 0.61411162  |
| histone cluster 1, H2ae                                     | HIST1H2AE  | 0.774164999 |
| histone cluster 1, H2af                                     | HIST1H2AF  | 0.555190635 |
| histone cluster 1, H2ah                                     | HIST1H2AH  | 0.498760914 |
| histone cluster 1, H2ai                                     | HIST1H2AI  | 0.647549554 |
| histone cluster 1, H2ak                                     | HIST1H2AK  | 0.542630049 |
| histone cluster 1, H2an                                     | HIST1H2AN  | 0.535316629 |
| histone cluster 2, H2aa2                                    | HIST2H2AA2 | 0.568323149 |
| histone cluster 2, H2ac                                     | HIST2H2AC  | 0.630053532 |
| heme oxygenase (decycling) 1                                | HMOX1      | 0.583778097 |
| hydroxysteroid (17-beta) dehydrogenase 7                    | HSD17B7    | 1.508292279 |
| heat shock protein 90, alpha (cytosolic), class A member 1  | HSP90AA1   | 0.509805865 |
| heat shock protein 2                                        | HSPA2      | 0.767093906 |
| heat shock protein 1                                        | HSPD1      | 0.766229945 |
| perlecan (heparan sulfate proteoglycan 2)                   | HSPG2      | 1.233203449 |
| HtrA serine peptidase 2                                     | HTRA2      | 0.626394771 |
| HtrA serine peptidase 3                                     | HTRA3      | 1.747448977 |
| hyaluronoglucosaminidase 2                                  | HYAL2      | 0.806840403 |
| isocitrate dehydrogenase 1 (NADP+), soluble                 | IDH1       | 1.488401693 |
| interferon induced transmembrane protein 3                  | IFITM3     | 0.671455329 |
| insulin-like growth factor binding protein 4                | IGFBP4     | 1.497180877 |
| insulin-like growth factor binding protein 6                | IGFBP6     | 1.151003742 |
| interleukin 11 receptor, alpha chain 1                      | IL11RA1    | 0.826389622 |
| interleukin 1 receptor-like 1                               | IL1RL1     | 0.743319981 |
| ilvB (bacterial acetolactate synthase)-like                 | ILVBL      | 1.254094    |
| IMP4, U3 small nucleolar ribonucleoprotein, homolog (yeast) | IMP4       | 0.808918665 |
| insulin induced gene 1                                      | INSIG1     | 1.444487417 |
| insulin receptor substrate 1                                | IRS1       | 0.63606939  |
| integrin alpha 3                                            | ITGA3      | 2.141473752 |
| integrin beta 1 binding protein 1                           | ITGB1BP1   | 1.334651712 |
| integrin, beta-like 1                                       | ITGBL1     | 1.448317974 |
| inositol 1,4,5-triphosphate receptor 3                      | ITPR3      | 1.477547396 |
| intersectin 2                                               | ITSN2      | 1.401220148 |
| influenza virus NS1A binding protein                        | IVNS1ABP   | 0.760325649 |
| Jun dimerization protein 2                                  | JDP2       | 0.711696682 |

|                                                                                           |              |             |
|-------------------------------------------------------------------------------------------|--------------|-------------|
| jumonji domain containing 2A                                                              | JMJD2A       | 1.615994893 |
| Jun oncogene                                                                              | JUN          | 0.642981542 |
| KN motif and ankyrin repeat domains 1                                                     | KANK1        | 1.39338367  |
| potassium voltage-gated channel, shaker-related subfamily, beta member 2                  | KCNAB2       | 1.315470027 |
| potassium channel, subfamily K, member 2                                                  | KCNK2        | 0.679305545 |
| potassium intermediate/small conductance calcium-activated channel, subfamily N, member 4 | KCNN4        | 1.359611002 |
| potassium channel tetramerisation domain containing 15                                    | KCTD15       | 1.32781674  |
| KH domain containing, RNA binding, signal transduction associated 1                       | KHDRBS1      | 0.791219927 |
| kinesin family member 3C                                                                  | KIF3C        | 1.483531925 |
| kinesin light chain 1                                                                     | KLC1         | 0.611203694 |
| Kruppel-like factor 13                                                                    | KLF13        | 1.278414804 |
| Kruppel-like factor 6                                                                     | KLF6         | 0.768274951 |
| kelch domain containing 3                                                                 | KLHDC3       | 1.521999636 |
| keratinocyte expressed, proline-rich                                                      | KPRP         | 0.346292766 |
| keratin 13                                                                                | KRT13        | 2.632711885 |
| keratin 14                                                                                | KRT14        | 1.411234735 |
| laminin, gamma 1                                                                          | LAMC1        | 1.174499884 |
| lysosomal-associated membrane protein 1                                                   | LAMP1        | 1.222930506 |
| Lbcl1                                                                                     | LBCL1        | 2.079031169 |
| limb-bud and heart                                                                        | LBH          | 1.613622373 |
| low density lipoprotein receptor adaptor protein 1                                        | LDLRAP1      | 1.316534403 |
| LIM domain and actin binding 1                                                            | LIMA1        | 0.696582251 |
| LIM-domain containing, protein kinase                                                     | LIMK1        | 1.230617896 |
| LIM and senescent cell antigen like domains 2                                             | LIMS2        | 2.197172981 |
| centromere protein J                                                                      | LIP1         | 0.443866181 |
| LPS-induced TN factor                                                                     | LITAF        | 1.312856146 |
| hypothetical protein                                                                      | LOC100038894 | 1.670473567 |
| similar to SP140 nuclear body protein family member                                       | LOC100039742 | 0.488036071 |
| similar to reproductive homeobox on X chromosome 2                                        | LOC100040016 | 0.110794322 |
| similar to Hmgcs1 protein                                                                 | LOC100040592 | 1.618352494 |
| similar to KIAA2019 protein                                                               | LOC100041194 | 0.286871964 |
| similar to Translocase of inner mitochondrial membrane 23 homolog (yeast)                 | LOC100041219 | 0.839392276 |
| Mus musculus similar to LSM7 homolog, U6 small nuclear RNA associated                     | LOC100041500 | 0.847827464 |
| hypothetical protein                                                                      | LOC100041725 | 1.337689077 |
| similar to Inosine 5-phosphate dehydrogenase 2                                            | LOC100042069 | 0.793868715 |
| similar to transmembrane emp24 domain-containing protein 10                               | LOC100042773 | 0.581777015 |
| similar to RNA binding motif protein 3                                                    | LOC100043257 | 1.193256277 |
| hypothetical protein LOC100043821                                                         | LOC100043821 | 1.255391351 |
| similar to thioredoxin reductase 2                                                        | LOC100044101 | 0.750505725 |
| hypothetical protein                                                                      | LOC100044194 | 0.827485842 |
| similar to euchromatic histone methyltransferase 1                                        | LOC100044324 | 1.18245652  |
| similar to ribosomal protein L36a                                                         | LOC100044425 | 0.806145665 |
| similar to cyclin N-terminal domain containing 1                                          | LOC100044557 | 1.187671381 |

|                                                                  |              |             |
|------------------------------------------------------------------|--------------|-------------|
| similar to WW domain-containing adapter protein with coiled-coil | LOC100044766 | 0.719455937 |
| similar to Fibrillarin                                           | LOC100044829 | 0.776705834 |
| similar to mKIAA1021 protein                                     | LOC100045280 | 1.195547922 |
| similar to FERMRhoGEF (Arhgef) and pleckstrin domain protein 1   | LOC100045542 | 1.552756197 |
| similar to purine nucleoside phosphorylase                       | LOC100045567 | 1.287850262 |
| similar to synaptotagmin XI                                      | LOC100045981 | 0.631134504 |
| similar to tripartite motif-containing 41                        | LOC100046003 | 1.163226581 |
| similar to histone deacetylase HD1                               | LOC100046039 | 1.225667348 |
| similar to OTU domain, ubiquitin aldehyde binding 1              | LOC100046081 | 1.250905615 |
| similar to IKK interacting protein                               | LOC100046322 | 0.683460596 |
| similar to aquaporin 5                                           | LOC100046616 | 1.362172944 |
| similar to Rab6 interacting protein 1                            | LOC100046953 | 1.18353463  |
| similar to BCL2-associated athanogene 5                          | LOC100047042 | 0.777476565 |
| similar to Small nuclear ribonucleoprotein polypeptide A         | LOC100047155 | 0.751715519 |
| similar to proteasome alpha7/C8 subunit                          | LOC100047184 | 0.689388511 |
| hypothetical protein                                             | LOC100047226 | 1.264174992 |
| similar to spermidine/spermine N1-acetyltransferase              | LOC100047261 | 1.478544106 |
| similar to solute carrier family 7                               | LOC100047619 | 1.525709232 |
| hypothetical protein                                             | LOC100047707 | 1.56855797  |
| similar to Aspartate aminotransferase, cytoplasmic               | LOC100047762 | 1.473513685 |
| similar to Memo1 protein                                         | LOC100047915 | 0.78563582  |
| similar to ADIR1                                                 | LOC100047963 | 1.375915761 |
| similar to Leucine zipper, putative tumor suppressor 2           | LOC100048460 | 1.227508273 |
| similar to four and a half LIM domains 3                         | LOC100048796 | 1.625676417 |
| LOC195286                                                        | LOC195286    | 0.476260263 |
| LOC215098                                                        | LOC215098    | 0.762251594 |
| LOC219049                                                        | LOC219049    | 0.754832478 |
| LOC226017                                                        | LOC226017    | 0.63468471  |
| LOC239727                                                        | LOC239727    | 0.632579    |
| LOC280205                                                        | LOC280205    | 0.800058159 |
| LOC380906                                                        | LOC380906    | 0.704335587 |
| LOC381215                                                        | LOC381215    | 0.800193248 |
| LOC381999                                                        | LOC381999    | 0.8527572   |
| LOC383125                                                        | LOC383125    | 0.686604983 |
| similar to 60S acidic ribosomal protein P0                       | LOC384710    | 0.777872224 |
| LOC384710                                                        | LOC385615    | 1.761958704 |
| LOC386135                                                        | LOC386135    | 0.514767162 |
| similar to heterogeneous nuclear ribonucleoprotein A3            | LOC621612    | 0.713194966 |
| similar to ZH10 protein                                          | LOC622491    | 0.635011804 |
| hypothetical protein                                             | LOC622994    | 0.85186933  |
| similar to Pyruvate kinase, muscle                               | LOC631301    | 1.4383849   |
| similar to ribosomal protein L27a-like                           | LOC635470    | 0.784977002 |
| similar to mevalonate kinase                                     | LOC637711    | 1.5039768   |

|                                                                        |           |             |
|------------------------------------------------------------------------|-----------|-------------|
| similar to cyclin-dependent kinase 2-interacting protein               | LOC640972 | 0.639953453 |
| similar to cytochrome c                                                | LOC670717 | 0.75130695  |
| similar to Glutathione S-transferase Mu 2 (GST class-mu 2)             | LOC670888 | 0.390701901 |
| similar to spermine synthase                                           | LOC671878 | 0.682553439 |
| hypothetical protein                                                   | LOC673501 | 0.556829446 |
| similar to downregulated in ovarian cancer 1 isoform 2                 | LOC676704 | 0.650215322 |
| similar to Glucose phosphate isomerase 1                               | LOC676974 | 1.274781233 |
| similar to putative protein phosphatase 1 nuclear targeting subunit    | LOC677319 | 0.635933032 |
| lon peptidase 1, mitochondrial                                         | LONP1     | 1.301555609 |
| lysyl oxidase                                                          | LOX       | 0.690530844 |
| lysyl oxidase-like 1                                                   | LOXL1     | 0.764541794 |
| lysyl oxidase-like 4                                                   | LOXL4     | 0.284584034 |
| lipin 1                                                                | LPIN1     | 1.449745258 |
| LIM domain containing preferred translocation partner in lipoma        | LPP       | 0.763598137 |
| low density lipoprotein receptor-related protein 11                    | LRP11     | 1.229556332 |
| leucine rich repeat containing 59                                      | LRRC59    | 1.377996358 |
| LSM12 homolog ( <i>S. cerevisiae</i> )                                 | LSM12     | 0.79362567  |
| LSM2 homolog, U6 small nuclear RNA associated ( <i>S. cerevisiae</i> ) | LSM2      | 1.246244663 |
| LSM6 homolog, U6 small nuclear RNA associated ( <i>S. cerevisiae</i> ) | LSM6      | 0.845651728 |
| lanosterol synthase                                                    | LSS       | 1.501851203 |
| latent transforming growth factor beta binding protein 2               | LTBP2     | 0.633833506 |
| latexin                                                                | LXN       | 1.514939958 |
| lymphocyte antigen 6 complex, locus C1                                 | LY6C1     | 1.356238816 |
| Ly1 antibody reactive clone                                            | LYAR      | 0.668675367 |
| LYR motif containing 2                                                 | LYRM2     | 0.767070492 |
| melanoma antigen, family D, 1                                          | MAGED1    | 1.235162049 |
| microtubule-associated protein 1 light chain 3 alpha                   | MAP1LC3A  | 1.484785784 |
| mitogen activated protein kinase kinase kinase 3                       | MAP2K3    | 1.208839177 |
| mitogen-activated protein kinase kinase kinase 11                      | MAP3K11   | 1.257269286 |
| mitogen-activated protein kinase kinase kinase 3                       | MAP3K3    | 1.181310712 |
| mitogen-activated protein kinase kinase kinase 8                       | MAP3K8    | 1.460241843 |
| mitogen-activated protein kinase kinase kinase 2                       | MAP4K2    | 1.300952465 |
| mitogen-activated protein kinase 1                                     | MAPK1     | 1.266621935 |
| myristoylated alanine rich protein kinase C substrate                  | MARCKS    | 0.768863854 |
| microtubule associated serine/threonine kinase family member 4         | MAST4     | 0.8316974   |
| membrane bound C2 domain containing protein                            | MBC2      | 1.224907085 |
| methylmalonyl CoA epimerase                                            | MCEE      | 0.804734307 |
| malic enzyme 2, NAD(+)-dependent, mitochondrial                        | ME2       | 1.306015297 |
| mediator complex subunit 16                                            | MED16     | 0.664772613 |
| mediator of RNA polymerase II transcription, subunit 6 homolog (yeast) | MED6      | 0.671009861 |
| myocyte enhancer factor 2C                                             | MEF2C     | 1.922007734 |
| milk fat globule-EGF factor 8 protein                                  | MFGE8     | 1.548532522 |
| mannoside acetylglucosaminyltransferase 4, isoenzyme B                 | MGAT4B    | 1.400812767 |

|                                                              |         |             |
|--------------------------------------------------------------|---------|-------------|
| mindbomb homolog 2 (Drosophila)                              | MIB2    | 1.249533796 |
| midline 2                                                    | MID2    | 1.389779829 |
| MAP kinase-interacting serine/threonine kinase 1             | MKNK1   | 1.351534893 |
| matrix metalloproteinase 24                                  | MMP24   | 0.721823792 |
| meiotic recombination 11 homolog A (S. cerevisiae)           | MRE11A  | 0.72767336  |
| mitochondrial ribosomal protein L38                          | MRPL38  | 1.185784141 |
| mitochondrial ribosomal protein L4                           | MRPL4   | 1.240209146 |
| mitochondrial ribosomal protein L43                          | MRPL43  | 1.194304642 |
| mitochondrial ribosomal protein L51                          | MRPL51  | 0.853173848 |
| mitochondrial ribosomal protein S16                          | MRPS16  | 0.782990217 |
| mitochondrial ribosomal protein S6                           | MRPS6   | 0.772821175 |
| mitochondrial ribosomal protein S9                           | MRPS9   | 0.825852723 |
| mutS homolog 6 (E. coli)                                     | MSH6    | 0.694646616 |
| metastasis-associated gene family, member 2                  | MTA2    | 1.182521057 |
| microtubule-associated protein 7 domain containing 1         | MTAP7D1 | 1.225591241 |
| mitochondrial carrier homolog 1 (C. elegans)                 | MTCH1   | 1.191974318 |
| mitochondrially encoded NADH dehydrogenase 5                 | MT-ND5  | 1.811156025 |
| mammary tumor virus receptor 2                               | MTVR2   | 1.210248282 |
| musculoskeletal, embryonic nuclear protein 1                 | MUSTN1  | 0.740971809 |
| mevalonate (diphospho) decarboxylase                         | MVD     | 1.602075273 |
| mevalonate kinase                                            | MVK     | 1.656174581 |
| matrix-remodelling associated 8                              | MXRA8   | 1.259624562 |
| myeloid-associated differentiation marker                    | MYADM   | 1.302177933 |
| myosin XVIIIb                                                | MYO18B  | 1.957801517 |
| myosin Ixb                                                   | MYO9B   | 1.171040126 |
| myosin IXb                                                   | MYO9B   | 1.174843669 |
| N-6 adenine-specific DNA methyltransferase 1 (putative)      | N6AMT1  | 0.762093628 |
| Ngfi-A binding protein 1                                     | NAB1    | 1.238031235 |
| nucleosome assembly protein 1-like 1                         | NAP1L1  | 0.738467591 |
| nuclear autoantigenic sperm protein (histone-binding)        | NASP    | 0.720328321 |
| neurochondrin                                                | NCDN    | 1.414199767 |
| N-myc downstream regulated gene 1                            | NDRG1   | 1.405912596 |
| NADH dehydrogenase (ubiquinone) flavoprotein 1               | NDUFV1  | 1.233961326 |
| neogenin                                                     | NEO1    | 2.243452254 |
| NeoR                                                         | NEOR    | 0.45136864  |
| nuclear factor, erythroid derived 2,-like 1                  | NFE2L1  | 1.651193857 |
| neuronal guanine nucleotide exchange factor                  | NGEF    | 3.826907249 |
| nerve growth factor, beta                                    | NGFB    | 0.598700874 |
| nerve growth factor receptor (TNFRSF16) associated protein 1 | NGFRAP1 | 0.843646873 |
| NHL repeat containing 2                                      | NHLRC2  | 1.255206221 |
| niban protein                                                | NIBAN   | 1.652423252 |
| ninjurin 1                                                   | NINJ1   | 1.593606947 |
| NFKB inhibitor interacting Ras-like protein 2                | NKIRAS2 | 1.349787368 |



non-metastatic cells 4, protein expressed in  
 nicotinamide N-methyltransferase  
 nucleolar protein 5A  
 nucleolar protein family A, member 2  
 nodal modulator 1  
 nephronophthisis 1 (juvenile) homolog (human)  
 nucleoplasmin 3, pseudogene 1  
 natriuretic peptide precursor type B  
 NAD(P)H dehydrogenase, quinone 2 (Nqo2).  
 nuclear receptor subfamily 2, group F, member 2  
 nuclear receptor subfamily 2, group F, member 6  
 neuritin 1  
 NAD(P) dependent steroid dehydrogenase-like  
 5'-nucleotidase, cytosolic III-like  
 5'-nucleotidase domain containing 2  
 5'-nucleotidase domain containing 3  
 negative regulator of ubiquitin-like proteins 1  
 nuclear distribution gene C homolog (Aspergillus)  
 nudix (nucleoside diphosphate linked moiety X)-type motif 1  
 nudix (nucleoside diphosphate linked moiety X)-type motif 22  
 nudix (nucleoside diphosphate linked moiety X)-type motif 5  
 nuclear protein 1  
 odd Oz/ten-m homolog 4 (Drosophila)  
 olfactomedin-like 3  
 ORAI calcium release-activated calcium modulator 1  
 ORM1-like 3  
 odd-skipped related 1  
 OTU domain containing 1  
 purinergic receptor P2Y, G-protein coupled 2  
 prolyl 4-hydroxylase, alpha polypeptide II  
 prolyl 4-hydroxylase, beta polypeptide  
 phosphofurin acidic cluster sorting protein 2  
 protein kinase C and casein kinase substrate in neurons 3  
 poly (A) polymerase alpha  
 3'-phosphoadenosine 5'-phosphosulfate synthase 2  
 poly (ADP-ribose) polymerase family, member 3  
 poly(rC) binding protein 2  
 protocadherin 1  
 polycomb group ring finger 6  
 Purkinje cell protein 2  
 phosphate cytidyltransferase 2, ethanolamine  
 platelet derived growth factor receptor, alpha polypeptide  
 platelet-derived growth factor receptor-like

|          |             |
|----------|-------------|
| NME4     | 0.735542576 |
| NNMT     | 0.53329963  |
| NOL5A    | 0.764509368 |
| NOLA2    | 0.849126811 |
| NOMO1    | 1.20907727  |
| NPHP1    | 0.590437553 |
| NPM3-PS1 | 1.216408721 |
| NPPB     | 0.783937184 |
| NQO2     | 1.335825811 |
| NR2F2    | 0.650250922 |
| NR2F6    | 1.225071212 |
| NRN1     | 1.233346895 |
| NSDHL    | 1.238471887 |
| NT5C3L   | 0.804002712 |
| NT5DC2   | 0.726116226 |
| NT5DC3   | 0.802829464 |
| NUB1     | 1.297859703 |
| NUDC     | 0.792888405 |
| NUDT1    | 0.739830205 |
| NUDT22   | 1.258769864 |
| NUDT5    | 0.833282791 |
| NUPR1    | 1.289924273 |
| ODZ4     | 0.750584159 |
| OLFML3   | 1.321228901 |
| ORAI1    | 1.687211928 |
| ORMDL3   | 1.472853693 |
| OSR1     | 0.561060194 |
| OTUD1    | 0.625263013 |
| P2RY2    | 1.324202439 |
| P4HA2    | 1.310336113 |
| P4HB     | 1.192562173 |
| PACS2    | 0.761470722 |
| PACSIN3  | 1.222946897 |
| PAPOLA   | 0.575049106 |
| PAPSS2   | 0.585380401 |
| PARP3    | 0.818630439 |
| PCBP2    | 1.158130873 |
| PCDH1    | 1.174991213 |
| PCGF6    | 0.740321418 |
| PCP2     | 0.759346824 |
| PCYT2    | 1.2048178   |
| PDGFRA   | 0.693109645 |
| PDGFRL   | 1.340598981 |

|                                                                                       |         |             |
|---------------------------------------------------------------------------------------|---------|-------------|
| PDZ and LIM domain 1                                                                  | PDLIM1  | 1.1549359   |
| PDZ and LIM domain 2                                                                  | PDLIM2  | 0.642272911 |
| PDZ domain containing 11                                                              | PDZD11  | 0.832624285 |
| peroxisome biogenesis factor 19                                                       | PEX19   | 1.261539756 |
| 6-phosphofructo-2-kinase/fructose-2,6-biphosphatase 4                                 | PFKFB4  | 1.399266441 |
| phosphofructokinase, platelet                                                         | PFKP    | 1.278014724 |
| profilin 2                                                                            | PFN2    | 0.742538027 |
| PHD finger protein 10                                                                 | PHF10   | 1.246208098 |
| phosphoinositide-3-kinase interacting protein 1                                       | PIK3IP1 | 1.747774167 |
| phosphatidylinositol-5-phosphate 4-kinase, type II, beta                              | PIP4K2B | 1.176431835 |
| praja 2, RING-H2 motif containing                                                     | PJA2    | 0.82821467  |
| phospholipase A2, activating protein                                                  | PLAA    | 0.753334387 |
| plasminogen activator, tissue                                                         | PLAT    | 1.442542493 |
| phospholipase C, delta 1                                                              | PLCD1   | 1.497950261 |
| pleckstrin homology domain containing, family M (with RUN domain) member 1            | PLEKHM1 | 1.408811165 |
| pleckstrin homology domain containing, family O member 1                              | PLEKHO1 | 1.47986083  |
| proteolipid protein (myelin) 1                                                        | PLP1    | 1.916119137 |
| phosphomevalonate kinase                                                              | PMVK    | 1.283183018 |
| patatin-like phospholipase domain containing 2                                        | PNPLA2  | 1.372878085 |
| podocan-like 1                                                                        | PODNL1  | 0.602335331 |
| polymerase (DNA directed), alpha 2                                                    | POLA2   | 1.525438022 |
| polymerase (DNA-directed), delta interacting protein 3                                | POLDIP3 | 0.833711028 |
| paraoxonase 2                                                                         | PON2    | 1.678253857 |
| phosphatidic acid phosphatase type 2B                                                 | PPAP2B  | 0.574059267 |
| protein tyrosine phosphatase, receptor-type, F interacting protein, binding protein 2 | PPFIBP2 | 1.516729206 |
| protein phosphatase 1A, magnesium dependent, alpha isoform                            | PPM1A   | 0.725920305 |
| protein phosphatase 1, catalytic subunit, alpha isoform                               | PPP1CA  | 1.238270439 |
| protein phosphatase 2, regulatory subunit B (B56), beta isoform                       | PPP2R5B | 1.6168081   |
| protein phosphatase 2, regulatory subunit B (B56), gamma isoform                      | PPP2R5C | 0.6442581   |
| protein phosphatase 2, regulatory subunit B (B56), delta isoform                      | PPP2R5D | 1.17963427  |
| putative phosphatase                                                                  | PPS     | 1.434201636 |
| proline arginine-rich end leucine-rich repeat                                         | PRELP   | 0.674879887 |
| protein kinase, cAMP dependent, catalytic, beta                                       | PRKACB  | 0.800807359 |
| protein kinase C substrate 80K-H                                                      | PRKCSH  | 1.194891288 |
| protein kinase, cGMP-dependent, type II                                               | PRKG2   | 1.376165355 |
| Prkr interacting protein 1 (IL11 inducible)                                           | PRKRIP1 | 1.331649266 |
| protein kinase, X-linked                                                              | PRKX    | 1.392950171 |
| protein arginine N-methyltransferase 1                                                | PRMT1   | 0.82503046  |
| protein arginine N-methyltransferase 6                                                | PRMT6   | 0.726383847 |
| prion protein                                                                         | PRNP    | 1.388609984 |
| proline rich 14                                                                       | PRR14   | 1.178472707 |
| presenilin 1                                                                          | PSEN1   | 0.72229389  |
| proteasome (prosome, macropain) subunit, beta type 10                                 | PSMB10  | 0.7363058   |

|                                                                                     |                |             |
|-------------------------------------------------------------------------------------|----------------|-------------|
| proteasome (prosome, macropain) 26S subunit, non-ATPase, 2                          | PSMD2          | 0.735456349 |
| proteasome (prosome, macropain) 26S subunit, non-ATPase, 7                          | PSMD7          | 0.804621868 |
| proteasome (prosome, macropain) 28 subunit, alpha                                   | PSME1          | 0.742895082 |
| polypyrimidine tract binding protein 1                                              | PTBP1          | 0.759565871 |
| protein tyrosine phosphatase-like (proline instead of catalytic arginine), member a | PTPLA          | 1.310888519 |
| protein tyrosine phosphatase, non-receptor type 21                                  | PTPN21         | 0.68531007  |
| pentraxin related gene                                                              | PTX3           | 0.674971817 |
| pumilio 2                                                                           | PUM2           | 1.30122089  |
| quinoid dihydropteridine reductase                                                  | QDPR           | 1.291169205 |
| RAB11 family interacting protein 5 (class I)                                        | RAB11FIP5      | 1.232370806 |
| RAB3 GTPase activating protein subunit 1                                            | RAB3GAP1       | 0.830861246 |
| RAB3 GTPase activating protein subunit 2                                            | RAB3GAP2       | 1.187666085 |
| RAS-related C3 botulinum substrate 1                                                | RAC1           | 1.364959091 |
| RAD51-like 1                                                                        | RAD51L1        | 0.667794348 |
| hnRNP-associated with lethal yellow                                                 | RALY           | 1.255571477 |
| RAN guanine nucleotide release factor                                               | RANGNRF        | 0.745027827 |
| RAN guanine nucleotide release factor                                               | RANGRF         | 0.847648343 |
| RAS related protein 2a                                                              | RAP2A          | 1.399195843 |
| retinoblastoma binding protein 4                                                    | RBBP4          | 1.643711889 |
| RNA binding motif protein 4                                                         | RBM4           | 1.255916546 |
| retinol binding protein 1, cellular                                                 | RBP1           | 1.720072637 |
| regulator of calcineurin 1                                                          | RCAN1          | 1.378348785 |
| RCE1 homolog, prenyl protein peptidase ( <i>S. cerevisiae</i> )                     | RCE1           | 1.266042087 |
| REST corepressor 1                                                                  | RCOR1          | 0.51154413  |
| retinol dehydrogenase 11 (all-trans/9-cis/11-cis)                                   | RDH11          | 0.818225479 |
| radixin                                                                             | RDX            | 0.671819363 |
| receptor accessory protein 4                                                        | REEP4          | 1.452624825 |
| receptor accessory protein 5                                                        | REEP5          | 1.272722777 |
| replication factor C (activator 1) 4                                                | RFC4           | 0.728105628 |
| RGM domain family, member A                                                         | RGMA           | 0.690834775 |
| regulator of G-protein signaling 16                                                 | RGS16          | 1.340088336 |
| regulator of G-protein signaling 3                                                  | RGS3           | 1.509914296 |
| rhomboid family 1                                                                   | RHBDF1         | 1.233489724 |
| Rho-related BTB domain containing 3                                                 | RHOBTB3        | 0.680330757 |
| ras homolog gene family, member D                                                   | RHOD           | 1.198758114 |
| ras homolog gene family, member J                                                   | RHOJ           | 0.759227335 |
| 18S RNA                                                                             | RN18S          | 0.533320699 |
| ring finger protein 166                                                             | RNF166         | 1.341011561 |
| ring finger protein 167                                                             | RNF167         | 1.315683058 |
| ring finger protein 181                                                             | RNF181         | 1.259436307 |
| similar to histone 2a                                                               | RP23-480B19.11 | 0.564000963 |
| Ribosomal protein L18A                                                              | RPL18A         | 0.752273483 |
| ribosomal protein L30                                                               | RPL30          | 0.743776082 |

|                                                                                        |                |             |
|----------------------------------------------------------------------------------------|----------------|-------------|
| ribosomal protein S19                                                                  | RPS19          | 0.763041959 |
| Ras-related GTP binding C                                                              | RRAGC          | 1.285361056 |
| ribosomal RNA processing 1 homolog B ( <i>S. cerevisiae</i> )                          | RRP1B          | 0.784449056 |
| radial spokehead-like 2A                                                               | RSHL2A         | 0.775614581 |
| RuvB-like protein 1                                                                    | RUVBL1         | 0.790716361 |
| retinoid X receptor beta                                                               | RXRB           | 1.215026129 |
| S100 calcium binding protein A3                                                        | S100A3         | 1.575342206 |
| S100 calcium binding protein A7A                                                       | S100A7A        | 0.397807699 |
| plasma membrane associated protein, S3-12                                              | S3-12          | 1.531224909 |
| sterile alpha motif domain containing 14                                               | SAMD14         | 1.257108092 |
| SAR1 gene homolog A ( <i>S. cerevisiae</i> )                                           | SAR1A          | 1.309773917 |
| salvador homolog 1 ( <i>Drosophila</i> )                                               | SAV1           | 0.70260065  |
| Shwachman-Bodian-Diamond syndrome homolog (human)                                      | SBDS           | 1.207390512 |
| SH3-binding kinase 1                                                                   | SBK1           | 0.721267807 |
| sterol-C4-methyl oxidase-like                                                          | SC4MOL         | 1.48450073  |
| SR-related CTD-associated factor 1                                                     | SCAF1          | 1.294663423 |
| scavenger receptor class B, member 1                                                   | SCARB1         | 1.3065101   |
| stearoyl-Coenzyme A desaturase 1                                                       | SCD1           | 1.611310023 |
| stearoyl-Coenzyme A desaturase 2                                                       | SCD2           | 1.432758454 |
| SCL0001118.1_0                                                                         | SCL0001118.1_1 | 0.701794784 |
| SCL0001849.1_2273                                                                      | SCL0001849.1_1 | 0.46044733  |
| SCL0002368.1_75                                                                        | SCL0002368.1_1 | 0.749601591 |
| SCL0015365.1_6                                                                         | SCL0015365.1_1 | 0.744464442 |
| scotin gene                                                                            | SCOTIN         | 1.265638343 |
| sterol carrier protein 2, liver                                                        | SCP2           | 1.322385943 |
| syndecan 3                                                                             | SDC3           | 0.414233793 |
| stromal cell derived factor 2                                                          | SDF2           | 1.199385844 |
| serum deprivation response                                                             | SDPR           | 0.536308924 |
| SEC23A                                                                                 | SEC23A         | 1.409968941 |
| SEC63-like (                                                                           | SEC63          | 0.81189794  |
| sema domain, immunoglobulin domain (Ig), short basic domain, secreted, (semaphorin) 3F | SEMA3F         | 1.708875319 |
| SUMO1/sentrin specific peptidase 1                                                     | SENP1          | 0.694007826 |
| SUMO/sentrin specific peptidase 3                                                      | SENP3          | 1.178031541 |
| selenoprotein N, 1                                                                     | SEPN1          | 1.23000849  |
| septin 8                                                                               | SEPT8          | 1.173685695 |
| selenoprotein W, muscle 1                                                              | SEPW1          | 1.680240487 |
| serine (or cysteine) peptidase inhibitor, clade A, member 1b                           | SERPINA1B      | 0.476795522 |
| serine (or cysteine) peptidase inhibitor, clade A, member 1d                           | SERPINA1D      | 0.425759286 |
| serine (or cysteine) peptidase inhibitor, clade B, member 6a                           | SERPINB6A      | 1.203654842 |
| SEC14 and spectrin domains 1                                                           | SESTD1         | 1.271595505 |
| splicing factor, arginine/serine-rich 5                                                | SFRS5          | 0.66628071  |
| sideroflexin 1                                                                         | SFXN1          | 0.789629222 |
| sideroflexin 3                                                                         | SFXN3          | 1.332046466 |

|                                                                                    |          |             |
|------------------------------------------------------------------------------------|----------|-------------|
| sphingomyelin synthase 1                                                           | SGMS1    | 0.725621329 |
| SH2 domain containing 6                                                            | SH2D6    | 1.889984598 |
| SH3-domain GRB2-like 3                                                             | SH3GL3   | 0.774677398 |
| serine hydroxymethyltransferase 2 (mitochondrial)                                  | SHMT2    | 1.261745086 |
| SIAT5                                                                              | SIAT5    | 0.795597354 |
| silica-induced gene 111                                                            | SILG111  | 1.350394337 |
| signal-induced proliferation-associated 1 like 1                                   | SIPA1L1  | 0.603524287 |
| SIVA1, apoptosis-inducing factor                                                   | SIVA1    | 0.653164805 |
| S-phase kinase-associated protein 2 (p45)                                          | SKP2     | 0.708713604 |
| solute carrier family 12, member 6                                                 | SLC12A6  | 1.294292453 |
| solute carrier family 19 (thiamine transporter), member 2                          | SLC19A2  | 0.797565724 |
| solute carrier family 1 (neutral amino acid transporter), member 5                 | SLC1A5   | 1.387478952 |
| solute carrier family 24 (sodium/potassium/calcium exchanger), member 6            | SLC24A6  | 1.350861113 |
| solute carrier family 25 (mitochondrial thiamine pyrophosphate carrier), member 19 | SLC25A19 | 1.399493284 |
| solute carrier family 25, member 28                                                | SLC25A28 | 1.246623666 |
| solute carrier family 25, member 33                                                | SLC25A33 | 1.82869726  |
| solute carrier family 25, member 39                                                | SLC25A39 | 1.325637727 |
| solute carrier family 27 (fatty acid transporter), member 1                        | SLC27A1  | 1.489840766 |
| solute carrier family 29 (nucleoside transporters), member 1                       | SLC29A1  | 1.198780961 |
| solute carrier family 31, member 1 (Slc31a1).                                      | SLC31A1  | 1.424095138 |
| solute carrier family 38, member 2                                                 | SLC38A2  | 1.235684342 |
| solute carrier family 39 (metal ion transporter), member 11                        | SLC39A11 | 1.218702627 |
| solute carrier family 44, member 1                                                 | SLC44A1  | 1.469175131 |
| solute carrier family 4 (anion exchanger), member 2                                | SLC4A2   | 1.201382118 |
| solute carrier family 6, member 6                                                  | SLC6A6   | 1.475712824 |
| solute carrier family 6 (neurotransmitter transporter, glycine), member 9          | SLC6A9   | 2.446745004 |
| solute carrier family 7 (cationic amino acid transporter, y+ system), member 11    | SLC7A11  | 1.747569164 |
| solute carrier family 9 (sodium/hydrogen exchanger), member 3 regulator 1          | SLC9A3R1 | 1.396262447 |
| slowmo homolog 2 (Drosophila)                                                      | SLMO2    | 0.817131297 |
| secreted Ly6/Plaur domain containing 1                                             | SLURP1   | 1.382727641 |
| SPARC related modular calcium binding 1                                            | SMOC1    | 1.513352801 |
| synaptosomal-associated protein 29                                                 | SNAP29   | 0.706838963 |
| small nuclear RNA activating complex, polypeptide 4                                | SNAPC4   | 1.29770179  |
| SNW domain containing 1                                                            | SNW1     | 0.711869363 |
| sorting nexin 10                                                                   | SNX10    | 1.17780956  |
| sorting nexin 7                                                                    | SNX7     | 0.781232724 |
| sterol O-acyltransferase 1                                                         | SOAT1    | 0.76879338  |
| sorbitol dehydrogenase                                                             | SORD     | 1.258403672 |
| SRY (sex determining region Y)-box 9                                               | SOX9     | 0.814849261 |
| sperm flagellar 1                                                                  | SPEF1    | 1.39243009  |
| spectrin beta 2                                                                    | SPNB2    | 1.249640034 |
| secreted phosphoprotein 1                                                          | SPP1     | 0.501259662 |
| squalene oxidase                                                                   | SQLE     | 1.548890122 |

|                                                               |          |             |
|---------------------------------------------------------------|----------|-------------|
| sequestosome 1                                                | SQSTM1   | 1.35044552  |
| scavenger receptor class B, member 1                          | SRB1     | 1.473409909 |
| sterol regulatory element binding factor 2                    | SREBF2   | 1.430614375 |
| spermidine synthase                                           | SRM      | 0.702585017 |
| sushi-repeat-containing protein, X-linked 2                   | SRPX2    | 0.7344173   |
| sulfiredoxin 1 homolog (S. cerevisiae)                        | SRXN1    | 0.773731455 |
| single-stranded DNA binding protein 3                         | SSBP3    | 1.271315283 |
| signal sequence receptor, delta                               | SSR4     | 0.835389794 |
| Sjogren's syndrome/scleroderma autoantigen 1 homolog (human)  | SSSCA1   | 0.671124805 |
| ST3 beta-galactoside alpha-2,3-sialyltransferase 5            | ST3GAL5  | 1.297051714 |
| STAR-related lipid transfer (START) domain containing 4       | STARD4   | 1.645457869 |
| STAR-related lipid transfer (START) domain containing 5       | STARD5   | 1.437056972 |
| stomatin                                                      | STOM     | 2.047746754 |
| SMT3 suppressor of mif two 3 homolog 3 (yeast)                | SUMO3    | 1.688956281 |
| sulfite oxidase                                               | SUOX     | 1.60460555  |
| suppressor of Ty 3 homolog (S. cerevisiae)                    | SUPT3H   | 0.787750602 |
| synapsin I                                                    | SYN1     | 1.500815282 |
| synaptojanin 2 binding protein                                | SYNJ2BP  | 0.671414413 |
| synaptopodin                                                  | SYNPO    | 0.663328186 |
| synaptophysin-like protein                                    | SYPL     | 1.23808071  |
| synovial apoptosis inhibitor 1                                | SYVN1    | 1.469787237 |
| transcription factor 19                                       | TCF19    | 0.757513414 |
| transcription factor 25 (basic helix-loop-helix)              | TCF25    | 1.326405991 |
| t-complex protein 1                                           | TCP1     | 0.757324316 |
| Tctex1 domain containing 2                                    | TCTEX1D2 | 0.754677945 |
| tudor and KH domain containing protein                        | TDRKH    | 0.681178225 |
| transferrin receptor                                          | TFRC     | 1.219194448 |
| TDP-glucose 4,6-dehydratase                                   | TGDS     | 1.30321036  |
| transforming growth factor, beta 3                            | TGFB3    | 1.278668387 |
| transforming growth factor, beta induced                      | TGFBI    | 1.723554081 |
| thymus cell antigen 1, theta                                  | THY1     | 0.583009401 |
| translocase of inner mitochondrial membrane 9 homolog (yeast) | TIMM9    | 0.740262222 |
| tissue inhibitor of metalloproteinase 3                       | TIMP3    | 1.465900912 |
| tubulointerstitial nephritis antigen-like                     | TINAGL   | 2.755111161 |
| thymidine kinase 1                                            | TK1      | 0.561375869 |
| transmembrane channel-like gene family 6                      | TMC6     | 1.62816742  |
| transmembrane protein 106C                                    | TMEM106C | 0.63849663  |
| transmembrane protein 111                                     | TMEM111  | 1.201370322 |
| transmembrane protein 43                                      | TMEM43   | 1.362532702 |
| transmembrane protein 9                                       | TMEM9    | 1.173820599 |
| thymopoietin                                                  | TMPO     | 0.716641738 |
| thymosin, beta 10                                             | TMSB10   | 1.674423553 |
| tenascin C                                                    | TNC      | 1.497943128 |

|                                                                |           |             |
|----------------------------------------------------------------|-----------|-------------|
| troponin T2, cardiac                                           | TNNT2     | 1.920932125 |
| tenascin XB                                                    | TNXB      | 1.246557298 |
| two pore channel 1                                             | TPCN1     | 1.408551957 |
| Tnf receptor-associated factor 3                               | TRAF3     | 0.779861535 |
| Tnf receptor associated factor 4                               | TRAF4     | 1.362173188 |
| three prime repair exonuclease 1                               | TREX1     | 1.405371817 |
| tribbles homolog 3 (Drosophila)                                | TRIB3     | 1.544023726 |
| tripartite motif-containing 27                                 | TRIM27    | 0.844907408 |
| tripartite motif protein 8                                     | TRIM8     | 1.349051288 |
| transformation related protein 53                              | TRP53     | 1.282617583 |
| transformation related protein 53 inducible nuclear protein 2  | TRP53INP2 | 1.394939192 |
| TSC22 domain family, member 1                                  | TSC22D1   | 1.344696073 |
| TSC22 domain family 3                                          | TSC22D3   | 1.618836437 |
| tetraspanin 14                                                 | TSPAN14   | 1.237721149 |
| tumor suppressing subtransferable candidate 1                  | TSSC1     | 1.376304134 |
| tetratricopeptide repeat domain 7B                             | TTC7B     | 0.651958108 |
| tetratricopeptide repeat domain 8                              | TTC8      | 0.662106805 |
| tubby-like protein 2                                           | TULP2     | 0.632945678 |
| twist gene homolog 1 (Drosophila)                              | TWIST1    | 1.269600898 |
| thioredoxin domain containing 5                                | TXNDC5    | 1.197072605 |
| thioredoxin interacting protein                                | TXNIP     | 0.576618198 |
| thioredoxin-like 4A                                            | TXNL4A    | 1.27531528  |
| thymidylate synthase                                           | TYMS      | 0.713161931 |
| uveal autoantigen with coiled-coil domains and ankyrin repeats | UACA      | 1.493109101 |
| ubiquitin-like 3                                               | UBL3      | 1.185095694 |
| UBX domain containing 1                                        | UBXD1     | 1.247727138 |
| uridine-cytidine kinase 2                                      | UCK2      | 0.710451611 |
| ubiquitin-fold modifier conjugating enzyme 1                   | UFC1      | 1.219920395 |
| UDP glucuronosyltransferase 1 family, polypeptide A6B          | UGT1A6B   | 1.372294908 |
| ubiquitin-like, containing PHD and RING finger domains 2       | UHRF2     | 0.692511872 |
| uridine monophosphate synthetase                               | UMPS      | 0.767284402 |
| unc-84 homolog A (C. elegans)                                  | UNC84A    | 1.175424297 |
| uridine phosphorylase 1                                        | UPP1      | 1.288908824 |
| unconventional SNARE in the ER 1 homolog (S. cerevisiae)       | USE1      | 0.75695059  |
| USO1 homolog, vesicle docking protein (yeast)                  | USO1      | 1.239565623 |
| ubiquitin specific peptidase 37                                | USP37     | 0.625002665 |
| vesicle-associated membrane protein 3                          | VAMP3     | 1.242117879 |
| vesicle amine transport protein 1 homolog (T californica)      | VAT1      | 1.327735429 |
| vitamin D receptor                                             | VDR       | 0.748025227 |
| vestigial like 3                                               | VGLL3     | 0.629695357 |
| very low density lipoprotein receptor                          | LDLR      | 0.304236402 |
| vacuolar protein sorting 53                                    | VPS53     | 0.73778934  |
| vaccinia related kinase 1                                      | VRK1      | 0.579745638 |

|                                                                                           |         |             |
|-------------------------------------------------------------------------------------------|---------|-------------|
| vesicle transport through interaction with t-SNAREs 1B homolog                            | VTI1B   | 0.637083388 |
| tryptophanyl-tRNA synthetase                                                              | WARS    | 0.781043121 |
| WD repeat domain 1 (Wdr1).                                                                | WDR1    | 1.224630972 |
| WD repeat domain 36                                                                       | WDR36   | 0.781997301 |
| WD repeat domain 45                                                                       | WDR45   | 1.473677759 |
| wingless-type MMTV integration site 9A                                                    | WNT9A   | 1.351726792 |
| WT1-interacting protein                                                                   | WTIP    | 0.845146905 |
| WW domain containing E3 ubiquitin protein ligase 2                                        | WWP2    | 1.255092721 |
| X-prolyl aminopeptidase (aminopeptidase P) 1, soluble                                     | XPNPEP1 | 1.168878022 |
| exportin, tRNA (nuclear export receptor for tRNAs)                                        | XPOT    | 1.238319703 |
| tyrosine 3-monooxygenase/tryptophan 5-monooxygenase activation protein, gamma polypeptide | YWHAG   | 1.62165869  |
| zinc finger and BTB domain containing 12                                                  | ZBTB12  | 0.702027788 |
| zinc finger CCCH type containing 14                                                       | ZC3H14  | 0.724705754 |
| zinc finger E-box binding homeobox 2                                                      | ZEB2    | 0.70937705  |
| zinc finger, AN1-type domain 2A                                                           | ZFAND2A | 1.305056486 |
| zinc finger, AN1 type domain 2B                                                           | ZFAND2B | 1.331331319 |
| zinc finger protein 282                                                                   | ZFP282  | 1.243102317 |
| zinc finger protein 292                                                                   | ZFP292  | 0.755949803 |
| zinc finger protein 639                                                                   | ZFP639  | 0.716222932 |
| zinc finger, MIZ-type containing 2                                                        | ZMIZ2   | 1.348206845 |



**Supplementary Table 5.**

List of genes whose expression was changed in YB-1 (1-219) expressing NIH3T3 cells compared to vector control cells

| Gene Name                                                                                               | Symbol   | Fold Change<br>(YB-1 (1-219) VS Ctrl.) |
|---------------------------------------------------------------------------------------------------------|----------|----------------------------------------|
| ATP-binding cassette, sub-family F (GCN20), member 2                                                    | ABCF2    | 1.336248197                            |
| ATP-binding cassette, sub-family G (WHITE), member 1                                                    | ABCG1    | 2.644996258                            |
| acetyl-Coenzyme A acyltransferase 1A                                                                    | ACAA1A   | 0.717241269                            |
| actin, alpha 2, smooth muscle, aorta                                                                    | ACTA2    | 0.774315169                            |
| a disintegrin-like and metallopeptidase (reprolysin type) with thrombospondin type 1 motif, 2           | ADAMTS2  | 0.775645102                            |
| ADAMTS-like 5                                                                                           | ADAMTSL5 | 1.468273565                            |
| adiponectin receptor 1                                                                                  | ADIPOR1  | 1.307085735                            |
| amino-terminal enhancer of split                                                                        | AES      | 1.539864639                            |
| AT hook containing transcription factor 1                                                               | AHCTF1   | 0.75470945                             |
| AHNAK nucleoprotein                                                                                     | AHNAK    | 0.755337591                            |
| AI481316                                                                                                | AI481316 | 0.646866353                            |
| adenylate kinase 1                                                                                      | AK1      | 0.738264186                            |
| A kinase (PRKA) anchor protein (yotiao) 9                                                               | AKAP9    | 0.647048001                            |
| aldo-keto reductase family 1, member B8                                                                 | AKR1B8   | 1.287278439                            |
| aldo-keto reductase family 1, member C12                                                                | AKR1C12  | 0.313655767                            |
| aldo-keto reductase family 1, member C18                                                                | AKR1C18  | 1.91545248                             |
| aldehyde dehydrogenase family 3, subfamily A1                                                           | ALDH3A1  | 0.372051664                            |
| arachidonate 5-lipoxygenase-activating protein                                                          | ALOX5AP  | 0.448301136                            |
| progressive ankylosis                                                                                   | ANK      | 0.690161442                            |
| ankyrin repeat domain 40                                                                                | ANKRD40  | 1.291413144                            |
| anthrax toxin receptor 2                                                                                | ANTXR2   | 1.446831278                            |
| adaptor protein complex AP-2, alpha 2 subunit                                                           | AP2A2    | 1.301184217                            |
| acylpeptide hydrolase                                                                                   | APEH     | 0.776928859                            |
| amyloid beta precursor protein (cytoplasmic tail) binding protein 2                                     | APPBP2   | 0.734982481                            |
| adaptor protein, phosphotyrosine interaction, PH domain and leucine zipper containing 2                 | APPL2    | 0.717682045                            |
| androgen-induced proliferation inhibitor                                                                | APRIN    | 0.7657142                              |
| ADP-ribosylation factor 3                                                                               | ARF3     | 1.220871863                            |
| Rho GTPase activating protein 17                                                                        | ARHGAP17 | 0.78739442                             |
| arylsulfatase A                                                                                         | ARSA     | 0.809673286                            |
| arsA (bacterial) arsenite transporter, ATP-binding, homolog 1                                           | ASNA1    | 1.466702137                            |
| ATG9 autophagy related 9 homolog B ( <i>S. cerevisiae</i> )                                             | ATG9B    | 1.64586037                             |
| ATPase, Na <sup>+</sup> /K <sup>+</sup> transporting, alpha 1 polypeptide                               | ATP1A1   | 1.192875549                            |
| ATPase, H <sup>+</sup> transporting, lysosomal V1 subunit B2                                            | ATP6V1B2 | 1.250830325                            |
| ATPase inhibitory factor 1                                                                              | ATPIF1   | 0.788130051                            |
| expressed sequence AU040320                                                                             | AU040320 | 1.22739889                             |
| HLA-B associated transcript 2                                                                           | BAT2     | 1.270308962                            |
| cDNA sequence BC003331                                                                                  | BC003331 | 0.688404066                            |
| cDNA sequence BC017612                                                                                  | BC017612 | 1.341315208                            |
| cDNA sequence BC064033                                                                                  | BC064033 | 0.688135655                            |
| branched chain ketoacid dehydrogenase E1, beta polypeptide                                              | BCKDHB   | 0.72609317                             |
| branched chain ketoacid dehydrogenase kinase                                                            | BCKDK    | 1.249251147                            |
| Bcl2-like 1                                                                                             | BCL2L1   | 1.514138131                            |
| B-cell leukemia/lymphoma 6                                                                              | BCL6     | 0.697563008                            |
| BCS1-like                                                                                               | BCS1L    | 0.803685272                            |
| 3-hydroxybutyrate dehydrogenase, type 2                                                                 | BDH2     | 0.617435706                            |
| biglycan                                                                                                | BGN      | 0.60514096                             |
| bicaudal C homolog 1 ( <i>Drosophila</i> )                                                              | BICC1    | 0.803172153                            |
| B-cell linker                                                                                           | BLNK     | 0.381272105                            |
| basigin                                                                                                 | BSG      | 1.238225324                            |
| bone marrow stromal cell antigen 2                                                                      | BST2     | 0.697754335                            |
| BTAF1 RNA polymerase II, B-TFIID transcription factor-associated, (Mot1 homolog, <i>S. cerevisiae</i> ) | BTAF1    | 0.803943057                            |
| calcium channel, voltage-dependent, alpha2/delta subunit 1                                              | CACNA2D1 | 0.692943541                            |
| capping protein (actin filament) muscle Z-line, beta                                                    | CAPZB    | 1.315101876                            |
| carbonyl reductase 1                                                                                    | CBR1     | 1.596989185                            |
| carbonyl reductase 2                                                                                    | CBR2     | 0.583255075                            |
| carbonyl reductase 3                                                                                    | CBR3     | 1.33353387                             |
| coiled-coil domain containing 131                                                                       | CCDC131  | 0.704880422                            |
| cholecystokinin                                                                                         | CCK      | 2.464581834                            |
| chemokine (C-C motif) ligand 7                                                                          | CCL7     | 0.722341188                            |
| chaperonin subunit 8 (theta)                                                                            | CCT8     | 1.267018359                            |
| CD248 antigen, endosialin                                                                               | CD248    | 0.702197917                            |
| CDC42 effector protein (Rho GTPase binding) 2                                                           | CDC42EP2 | 1.352940068                            |
| cadherin 5, type 2 (vascular endothelium)                                                               | CDH5     | 0.502601823                            |
| cyclin-dependent kinase 2                                                                               | CDK2     | 1.335008869                            |
| ChaC, cation transport regulator-like 1                                                                 | CHAC1    | 1.633375442                            |
| claudin domain containing 1                                                                             | CLDND1   | 1.335227033                            |
| chloride intracellular channel 4 (mitochondrial)                                                        | CLIC4    | 1.259262326                            |

|                                                                                     |                   |             |
|-------------------------------------------------------------------------------------|-------------------|-------------|
| CDC-like kinase 1                                                                   | CLK1              | 0.765262024 |
| circadian locomoter output cycles kaput                                             | CLOCK             | 0.781823303 |
| cleft lip and palate associated transmembrane protein 1                             | CLPTM1            | 1.286043242 |
| Coenzyme A synthase                                                                 | COASY             | 1.482974947 |
| cordon-bleu                                                                         | COBL              | 1.40029826  |
| collagen, type I, alpha 1                                                           | COL1A1            | 1.526885393 |
| procollagen, type IV, alpha 1                                                       | COL4A1            | 1.475411381 |
| procollagen, type V, alpha 1                                                        | COL5A1            | 0.683696255 |
| procollagen, type VI, alpha 3                                                       | COL6A3            | 0.814147838 |
| COMM domain containing 3                                                            | COMM3             | 0.759171736 |
| coatomer protein complex, subunit epsilon                                           | COPE              | 0.814202856 |
| coatomer protein complex, subunit zeta 2                                            | COPZ2             | 0.758642134 |
| coenzyme Q10 homolog B (S. cerevisiae)                                              | COQ10B            | 1.216851477 |
| carnitine acetyltransferase                                                         | CRAT              | 1.346599323 |
| cytokine receptor-like factor 1                                                     | CRLF1             | 0.6474682   |
| crystallin, lambda 1                                                                | CRYL1             | 0.698137879 |
| CTD (carboxy-terminal domain, RNA polymerase II, polypeptide A) small phosphatase 1 | CTDSP1            | 1.232922938 |
| connective tissue growth factor                                                     | CTGF              | 0.540592089 |
| cytidine 5'-triphosphate synthase                                                   | CTPS              | 1.442466376 |
| CUG triplet repeat, RNA binding protein 1                                           | CUGBP1            | 1.367477681 |
| CAAX box 1 homolog A (human)                                                        | CXX1A             | 0.716966184 |
| cytochrome b-561                                                                    | CYB561            | 0.717508498 |
| cytochrome b5 reductase 3                                                           | CYB5R3            | 1.201001673 |
| cytochrome b-245, alpha polypeptide                                                 | CYBA              | 0.517317298 |
| cytochrome P450, family 26, subfamily b, polypeptide 1                              | CYP26B1           | 0.62295764  |
| cytochrome P450, family 2, subfamily d, polypeptide 22                              | CYP2D22           | 0.730498244 |
| decorin (Dcn)                                                                       | DCN               | 0.25709716  |
| DEAD (Asp-Glu-Ala-Asp) box polypeptide 6                                            | DDX6              | 0.753086971 |
| 24-dehydrocholesterol reductase                                                     | DHCR24            | 1.77421642  |
| delta-like 1 homolog (Drosophila)                                                   | DLK1              | 0.463047046 |
| dystrophia myotonica-containing WD repeat motif                                     | DMWD              | 1.267936136 |
| dynamamin 3, opposite strand (Dnm3os) on chromosome 1                               | DNM3OS            | 0.537292844 |
| dual specificity phosphatase 4                                                      | DUSP4             | 1.401135853 |
| extracellular matrix protein 1                                                      | ECM1              | 0.563216732 |
| predicted gene, EG433229                                                            | EG433229          | 0.684416491 |
| predicted gene, EG667135                                                            | EG667135          | 0.399110495 |
| EGR3                                                                                | EGR3              | 0.597482832 |
| EH-domain containing 1                                                              | EHD1              | 1.468925176 |
| eukaryotic translation initiation factor 2-alpha kinase 2                           | EIF2AK2           | 0.658038057 |
| argonate RISC catalytic component 3                                                 | EIF2C3            | 0.600544774 |
| ELK3, member of ETS oncogene family                                                 | ELK3              | 0.797788047 |
| elongation of very long chain fatty acids (FEN1/Elo2, SUR4/Elo3, yeast)-like 1      | ELOVL1            | 1.283327275 |
| echinoderm microtubule associated protein like 1                                    | EML1              | 0.666317572 |
| enabled homolog (Drosophila)                                                        | ENAH              | 1.534390077 |
| enolase 2, gamma neuronal                                                           | ENO2              | 0.69326572  |
| predicted gene, ENSMUSG0000053178                                                   | ENSMUSG0000053178 | 0.762646592 |
| epidermal growth factor receptor pathway substrate 8                                | EPS8              | 1.401047442 |
| electron transferring flavoprotein, beta polypeptide                                | ETFB              | 0.811235565 |
| enhancer trap locus 4                                                               | ETL4              | 0.649559671 |
| ets variant gene 4 (E1A enhancer binding protein, E1AF)                             | ETV4              | 1.336689871 |
| fatty acid desaturase 2                                                             | FADS2             | 1.281012441 |
| fumarylacetoacetate hydrolase                                                       | FAH               | 0.76030055  |
| FERM, RhoGEF and pleckstrin domain protein 2                                        | FARP2             | 0.761976392 |
| phenylalanyl-tRNA synthetase, beta subunit                                          | FARSB             | 1.211510023 |
| Fas-activated serine/threonine kinase                                               | FASTK             | 1.383825692 |
| Fc fragment of IgG, receptor, transporter, alpha                                    | FCGR1             | 0.591505249 |
| fasciculation and elongation protein zeta 2 (zygin II)                              | FEZ2              | 1.260207481 |
| four and a half LIM domains 3                                                       | FHL3              | 1.689607612 |
| FK506 binding protein 9                                                             | FKBP9             | 0.804147703 |
| flotillin 1                                                                         | FLOT1             | 0.740003382 |
| FMS-like tyrosine kinase 1                                                          | FLT1              | 1.535519234 |
| fibronectin 1                                                                       | FN1               | 0.66410919  |
| forkhead box P1                                                                     | FOXP1             | 1.409351912 |
| forkhead box S1                                                                     | FOXS1             | 0.623071308 |
| fascin homolog 1, actin bundling protein (Strongylocentrotus purpuratus)            | FSCN1             | 1.67953598  |
| follistatin-like 1                                                                  | FSTL1             | 0.706535909 |
| glucose-6-phosphate dehydrogenase X-linked                                          | G6PDX             | 1.371390099 |
| UDP-N-acetyl-alpha-D-galactosamine:polypeptide N-acetylgalactosaminyltransferase 2  | GALNT2            | 0.781070663 |
| alpha glucosidase 2 alpha neutral subunit                                           | GANAB             | 1.30154027  |
| GTPase activating RANGAP domain-like 3                                              | GARNL3            | 0.745908093 |
| GTP cyclohydrolase I feedback regulator                                             | GCHFR             | 1.403499487 |
| glutamate-cysteine ligase , modifier subunit                                        | GCCLM             | 1.348682229 |

|                                                                                              |              |             |
|----------------------------------------------------------------------------------------------|--------------|-------------|
| glutamine fructose-6-phosphate transaminase 2                                                | GFPT2        | 0.672576686 |
| gap junction membrane channel protein alpha 1                                                | GJA1         | 0.801614749 |
| galactosidase, beta 1                                                                        | GLB1         | 0.75163123  |
| glycosyltransferase 8 domain containing 1                                                    | GLT8D1       | 0.771768571 |
| glycine-N-acyltransferase                                                                    | GLYAT        | 1.519865128 |
| gene model 773                                                                               | GM773        | 0.145740508 |
| glycoprotein Ib, beta polypeptide                                                            | GP1BB        | 1.342068555 |
| GC-rich promoter binding protein 1                                                           | GPBP1        | 0.755772037 |
| glycoprotein (transmembrane) nmb                                                             | GPNMB        | 1.22924837  |
| glycoprotein, synaptic 2                                                                     | GPSN2        | 1.252115218 |
| glutathione S-transferase, alpha 4                                                           | GSTA4        | 0.649976454 |
| glutathione S-transferase, mu 2                                                              | GSTM2        | 0.509046203 |
| glutathione S-transferase omega 1                                                            | GSTO1        | 1.28580168  |
| glutathione S-transferase omega 2                                                            | GSTO2        | 1.398543615 |
| glutathione S-transferase, theta 3                                                           | GSTT3        | 0.333837791 |
| general transcription factor II I                                                            | GTF2I        | 0.682484308 |
| H2A histone family, member V                                                                 | H2AFV        | 0.773636851 |
| H2A histone family, member X                                                                 | H2AFX        | 1.340169299 |
| histocompatibility 2, class II, locus Mb1                                                    | H2-DMB1      | 0.620698421 |
| histocompatibility 2, class II, locus Mb2                                                    | H2-DMB2      | 0.680167802 |
| H2-K region expressed gene 6                                                                 | H2-KE6       | 0.724054961 |
| hyaluronan synthase 2                                                                        | HAS2         | 0.640926144 |
| hemoglobin Z, beta-like embryonic chain                                                      | HBB-BH1      | 1.558116557 |
| histidine triad nucleotide binding protein 2                                                 | HINT2        | 0.752967832 |
| histone cluster 2, H2aa1                                                                     | HIST2H2AA1   | 0.701558085 |
| high mobility group AT-hook 1                                                                | HMGA1        | 1.292306895 |
| heterogeneous nuclear ribonucleoprotein L                                                    | HNRPL        | 1.256032898 |
| inhibitor of apoptosis                                                                       | IAP          | 0.702643932 |
| interferon induced transmembrane protein 3                                                   | IFITM3       | 0.500626157 |
| insulin-like growth factor binding protein 4                                                 | IGFBP4       | 1.869043948 |
| insulin-like growth factor binding protein 7                                                 | IGFBP7       | 0.80330239  |
| interleukin 11 receptor, alpha chain 1                                                       | IL11RA1      | 0.735963635 |
| interleukin 1 receptor-like 1                                                                | IL1RL1       | 0.756893547 |
| importin 5                                                                                   | IPO5         | 1.445704903 |
| IQ motif containing F5                                                                       | IQCF5        | 0.65914949  |
| integrin alpha 3                                                                             | ITGA3        | 3.225195125 |
| integrin, beta-like 1                                                                        | ITGBL1       | 1.287449917 |
| potassium voltage-gated channel, shaker-related subfamily, beta member 2                     | KCNAB2       | 1.21639332  |
| KH domain containing, RNA binding, signal transduction associated 1                          | KHDRBS1      | 1.272348282 |
| kallikrein related-peptidase 10                                                              | KLK10        | 1.559605935 |
| kinetochore associated 1                                                                     | KNTC1        | 0.801067186 |
| laminin, gamma 2                                                                             | LAMC2        | 1.298354283 |
| LAG1 homolog, ceramide synthase 2                                                            | LASS2        | 1.219731686 |
| lectin, galactose binding, soluble 9                                                         | LGALS9       | 1.333357503 |
| lipoma HMGIC fusion partner-like 2                                                           | LHFPL2       | 0.812222039 |
| LIM domains containing 1                                                                     | LIMD1        | 1.296268983 |
| LIM and senescent cell antigen like domains 2                                                | LIMS2        | 1.589210626 |
| hypothetical protein LOC100038894                                                            | LOC100038894 | 1.446998459 |
| similar to SP140 nuclear body protein family member                                          | LOC100039742 | 0.538736562 |
| similar to LSM7 homolog, U6 small nuclear RNA associated                                     | LOC100041500 | 0.727281781 |
| hypothetical protein LOC100041725                                                            | LOC100041725 | 1.407281493 |
| hypothetical protein LOC100043821                                                            | LOC100043821 | 0.612599446 |
| similar to thioredoxin reductase 2                                                           | LOC100044101 | 0.70183427  |
| hypothetical protein LOC100044177                                                            | LOC100044177 | 1.216920086 |
| hypothetical protein LOC100044194                                                            | LOC100044194 | 0.823809462 |
| hypothetical protein LOC100045737                                                            | LOC100045737 | 1.307379522 |
| similar to histone deacetylase HD1                                                           | LOC100046039 | 1.225151057 |
| similar to Protein phosphatase 2, regulatory subunit B (B56), alpha                          | LOC100046393 | 1.26021976  |
| similar to aquaporin 5                                                                       | LOC100046616 | 0.55569473  |
| similar to solute carrier family 7 (cationic amino acid transporter, y+ system), member 5    | LOC100047619 | 1.424484835 |
| hypothetical protein LOC100047707                                                            | LOC100047707 | 1.254838619 |
| hypothetical protein LOC100048316                                                            | LOC100048316 | 1.280429844 |
| similar to Myeloid leukemia factor 2                                                         | LOC100048413 | 1.410186002 |
| similar to fibronectin leucine rich transmembrane protein 3, transcript variant 1            | LOC100048721 | 0.755316683 |
| similar to four and a half LIM domains 3                                                     | LOC100048796 | 1.709350286 |
| LOC280487                                                                                    | LOC280487    | 0.46962632  |
| LOC385068                                                                                    | LOC385068    | 0.599069041 |
| LOC385615                                                                                    | LOC385615    | 0.533670614 |
| LOC386135                                                                                    | LOC386135    | 0.519545438 |
| similar to ZH10 protein                                                                      | LOC622491    | 0.811866971 |
| similar to Pyruvate kinase, muscle                                                           | LOC631301    | 1.429010823 |
| similar to Glutathione S-transferase Mu 2 (GST class-mu 2) (Glutathione S-transferase pmGT2) | LOC670888    | 0.556196287 |

|                                                                                  |           |             |
|----------------------------------------------------------------------------------|-----------|-------------|
| hypothetical protein LOC673501                                                   | LOC673501 | 0.37749915  |
| similar to Glucose phosphate isomerase 1                                         | LOC676974 | 1.290089757 |
| LOC98434                                                                         | LOC98434  | 0.50225924  |
| lysyl oxidase                                                                    | LOX       | 0.616449969 |
| LIM domain containing preferred translocation partner in lipoma                  | LPP       | 0.548163774 |
| leucine rich repeat containing 41                                                | LRRC41    | 1.299605083 |
| LSM2 homolog, U6 small nuclear RNA associated (S. cerevisiae)                    | LSM2      | 1.276060053 |
| lanosterol synthase                                                              | LSS       | 1.27301149  |
| latent transforming growth factor beta binding protein 2                         | LTBP2     | 0.654115879 |
| lymphocyte antigen 6 complex, locus A                                            | LY6A      | 0.741213481 |
| lymphocyte antigen 6 complex, locus C1                                           | LY6C1     | 0.66401449  |
| Ly6/neurotoxin 1                                                                 | LYNX1     | 0.674926326 |
| lysophospholipase 3                                                              | LYPLA3    | 0.707520738 |
| melanoma antigen, family D, 1                                                    | MAGED1    | 0.765928325 |
| melanoma antigen, family D, 2                                                    | MAGED2    | 0.799686009 |
| mannosidase, alpha, class 1B, member 1                                           | MAN1B1    | 1.273365578 |
| mitogen-activated protein kinase 11                                              | MAPK11    | 1.356030719 |
| MARCKS-like 1                                                                    | MARCKSL1  | 1.567474534 |
| microtubule associated serine/threonine kinase 3                                 | MAST3     | 0.766394901 |
| muscleblind-like 1                                                               | MBNL1     | 0.828778217 |
| membrane bound O-acyltransferase domain containing 1                             | MBOAT1    | 1.260147333 |
| mcf.2 transforming sequence-like                                                 | MCF2L     | 0.686763925 |
| mediator of RNA polymerase II transcription, subunit 25 homolog (yeast)          | MED25     | 0.768110079 |
| microfibrillar associated protein 5                                              | MFAP5     | 2.058568425 |
| mannoside acetylglucosaminyltransferase 4, isoenzyme B                           | MGAT4B    | 1.486926641 |
| matrix metalloproteinase 14 (membrane-inserted)                                  | MMP14     | 0.747026629 |
| molybdenum cofactor synthesis 1                                                  | MCOCS1    | 0.758298401 |
| mitochondrial ribosomal protein S9                                               | MRPS9     | 0.75210777  |
| mesothelin                                                                       | MSLN      | 2.544207197 |
| mitochondrial carrier homolog 1 (C. elegans)                                     | MTCH1     | 0.791720372 |
| mitochondrial transcription termination factor.                                  | MTERF     | 0.76117205  |
| metaxin 1                                                                        | MTX1      | 0.798395978 |
| myosin XVIIIb                                                                    | MYO18B    | 3.125211946 |
| myosin Ixb                                                                       | MYO9B     | 0.806525707 |
| alpha-N-acetylglucosaminidase                                                    | NAGLU     | 0.689715936 |
| neurochondrin                                                                    | NCDN      | 1.405265752 |
| N-myc downstream regulated gene 1                                                | NDRG1     | 1.30858591  |
| NADH dehydrogenase (ubiquinone) 1 alpha subcomplex, 1                            | NDUFA1    | 0.753811364 |
| NADH dehydrogenase (ubiquinone) 1 alpha subcomplex, 4                            | NDUFA4    | 0.77647225  |
| neuron derived neurotrophic factor                                               | NENF      | 0.69528609  |
| NeoR                                                                             | NEOR      | 0.560101936 |
| neuronal guanine nucleotide exchange factor                                      | NGEF      | 2.177744105 |
| nicotinamide N-methyltransferase                                                 | NNMT      | 1.405326152 |
| Notch gene homolog 4 (Drosophila)                                                | NOTCH4    | 0.796533153 |
| nucleoplasm 3, pseudogene 1                                                      | NPM3-PS1  | 1.447771073 |
| nuclear receptor binding protein 2                                               | NRBP2     | 0.682053811 |
| nurim (nuclear envelope membrane protein)                                        | NRM       | 0.784176336 |
| 5'-nucleotidase, cytosolic III-like                                              | NT5C3L    | 0.790236801 |
| nucleobindin 1                                                                   | NUCB1     | 0.611839685 |
| oligonucleotide/oligosaccharide-binding fold containing 2B                       | OBFC2B    | 1.645127001 |
| ORAI calcium release-activated calcium modulator 1                               | ORAI1     | 1.33327314  |
| poly (ADP-ribose) polymerase family, member 3                                    | PARP3     | 1.391733994 |
| polybromo 1                                                                      | PBRM1     | 0.714353633 |
| poly(rC) binding protein 2                                                       | PCBP2     | 1.230692319 |
| platelet derived growth factor receptor, alpha polypeptide                       | PDGFRA    | 0.564011915 |
| PDZ and LIM domain 1 (elfin)                                                     | PDLIM1    | 1.281802249 |
| PDZ and LIM domain 2                                                             | PDLIM2    | 0.692359327 |
| penta-EF hand domain containing 1                                                | PEF1      | 1.460406865 |
| prefoldin 5                                                                      | PFDN5     | 0.80748005  |
| profilin 1                                                                       | PFN1      | 1.257668804 |
| phosphatidylinositol 4-kinase type 2 beta                                        | PI4K2B    | 1.275797751 |
| phosphatidylinositol glycan anchor biosynthesis, class Y-like                    | PIGYL     | 0.800354295 |
| procollagen-lysine, 2-oxoglutarate 5-dioxygenase 2                               | PLOD2     | 1.448680729 |
| proteolipid protein (myelin) 1                                                   | PLP1      | 0.410692584 |
| phospholipid scramblase 1                                                        | PLSCR1    | 1.319976416 |
| paraoxonase 2                                                                    | PON2      | 1.224026667 |
| phosphatidic acid phosphatase type 2B                                            | PPAP2B    | 0.624496816 |
| protein phosphatase 1, catalytic subunit, alpha isoform                          | PPP1CA    | 1.325941921 |
| protein phosphatase 1, regulatory (inhibitor) subunit 8                          | PPP1R8    | 1.224067704 |
| protein phosphatase 1, regulatory subunit 9B                                     | PPP1R9B   | 1.256617943 |
| protein phosphatase 2 (formerly 2A), regulatory subunit A (PR 65), alpha isoform | PPP2R1A   | 1.258616974 |
| protein phosphatase 2A, regulatory subunit B (PR 53)                             | PPP2R4    | 1.249984686 |

|                                                                    |                   |             |
|--------------------------------------------------------------------|-------------------|-------------|
| proline arginine-rich end leucine-rich repeat                      | PRELP             | 0.219671551 |
| protein kinase, cAMP dependent regulatory, type I, alpha           | PRKAR1A           | 0.790344622 |
| protein kinase, X-linked                                           | PRKX              | 1.316606046 |
| pleckstrin homology, Sec7 and coiled-coil domains, binding protein | PSCDBP            | 1.382932135 |
| proteasome (prosome, macropain) 28 subunit, 3                      | PSME3             | 1.231749727 |
| pentraxin related gene                                             | PTX3              | 0.629769726 |
| poliovirus receptor                                                | PVR               | 1.512092541 |
| RAB1B, member RAS oncogene family                                  | RAB1B             | 1.423719023 |
| RAB8B, member RAS oncogene family                                  | RAB8B             | 0.710384657 |
| RAS-related C3 botulinum substrate 1                               | RAC1              | 1.320956175 |
| RAD23a homolog (S. cerevisiae)                                     | RAD23A            | 1.407241934 |
| hnRNP-associated with lethal yellow                                | RALY              | 1.35952281  |
| retinoblastoma binding protein 4                                   | RBBP4             | 1.726042275 |
| RNA binding motif protein 38                                       | RBM38             | 1.532850022 |
| retinol dehydrogenase 11 (all-trans/9-cis/11-cis)                  | RDH11             | 0.74135948  |
| retinol saturase (all trans retinol 13,14 reductase)               | RETSAT            | 0.758161535 |
| REX1, RNA exonuclease 1 homolog (S. cerevisiae)                    | REXO1             | 1.417542089 |
| replication factor C (activator 1) 4                               | RFC4              | 0.811632218 |
| RGM domain family, member A                                        | RGMA              | 0.677915107 |
| regulator of G-protein signaling 16                                | RGS16             | 2.124502842 |
| rhomboid domain containing 1                                       | RHBDD1            | 1.271118833 |
| rhomboid family 1                                                  | RHBDF1            | 0.800800489 |
| ras homolog gene family, member J                                  | RHOJ              | 0.643352985 |
| 18S RNA (Rn18s) on chromosome 17                                   | RN18S             | 0.380616002 |
| Ras-related GTP binding C                                          | RRAGC             | 1.315620938 |
| RRP9, small subunit (SSU) processome component, homolog (yeast)    | RRP9              | 1.273462759 |
| S100 calcium binding protein A7A                                   | S100A7A           | 2.314661744 |
| SAP30-like                                                         | SAP30L            | 1.461875515 |
| suprabasin                                                         | SBSN              | 0.737464611 |
| sterol-C4-methyl oxidase-like                                      | SC4MOL            | 1.318208525 |
| secretory carrier membrane protein 5                               | SCAMP5            | 0.736914486 |
| scavenger receptor class A, member 3                               | SCARA3            | 0.421143187 |
| scavenger receptor class A, member 5 (putative)                    | SCARA5            | 0.380779176 |
| SCL0001849.1_2273                                                  | SCL0001849.1_2273 | 0.634867947 |
| syndecan 3                                                         | SDC3              | 0.486279528 |
| serum deprivation response                                         | SDPR              | 1.350954115 |
| SUMO/sentrin specific peptidase 3                                  | SEN3              | 1.259193182 |
| selenoprotein W, muscle 1                                          | SENP1             | 1.517616963 |
| serine (or cysteine) peptidase inhibitor, clade A, member 3N       | SERPINA3N         | 0.117198551 |
| serine (or cysteine) peptidase inhibitor, clade F, member 1        | SERPINF1          | 0.795291026 |
| SET domain containing (lysine methyltransferase) 8                 | SETD8             | 1.365194081 |
| splicing factor 1                                                  | SF1               | 1.280495042 |
| splicing factor 3b, subunit 4                                      | SF3B4             | 1.299054694 |
| SH3-domain GRB2-like 3                                             | SH3GL3            | 1.424807898 |
| serine hydroxymethyltransferase 2 (mitochondrial)                  | SHMT2             | 1.321009547 |
| sialic acid binding Ig-like lectin G                               | SIGLECG           | 1.718946306 |
| signal-induced proliferation-associated 1 like 1                   | SIPA1L1           | 0.775492336 |
| solute carrier family 1 (neutral amino acid transporter), member 5 | SLC1A5            | 1.26498218  |
| solute carrier family 25, member 33                                | SLC25A33          | 1.520473794 |
| solute carrier family 25, member 45                                | SLC25A45          | 1.57463983  |
| solute carrier family 9 (sodium/hydrogen exchanger), member 1      | SLC9A1            | 0.756636057 |
| secreted Ly6/Plaur domain containing 1                             | SLURP1            | 0.536119605 |
| structural maintenance of chromosomes 1A                           | SMC1A             | 0.713109717 |
| SMAD specific E3 ubiquitin protein ligase 1                        | SMURF1            | 1.389694272 |
| sushi, nidogen and EGF-like domains 1                              | SNED1             | 0.421191435 |
| sorting nexin 17                                                   | SNX17             | 0.829081331 |
| sorbitol dehydrogenase                                             | SORD              | 1.249491887 |
| SPECC1-like                                                        | SPECC1L           | 0.815911413 |
| sphingosine kinase 1                                               | SPHK1             | 0.601791408 |
| spondin 2, extracellular matrix protein                            | SPON2             | 0.442316057 |
| secreted phosphoprotein 1                                          | SPP1              | 0.334152605 |
| serum response factor                                              | SRF               | 0.781228421 |
| sushi-repeat-containing protein, X-linked 2                        | SRPX2             | 0.671585325 |
| beta galactoside alpha 2,6 sialyltransferase 1                     | ST6GAL1           | 0.785958091 |
| stress-induced phosphoprotein 1                                    | STIP1             | 1.440048247 |
| stomatin                                                           | STOM              | 1.378078235 |
| sulfite oxidase                                                    | SUOX              | 1.304873858 |
| synapsin I                                                         | SYN1              | 1.55420425  |
| synaptopodin                                                       | SYNPO             | 0.431306192 |
| transgelin 2                                                       | TAGLN2            | 1.26546507  |
| transporter 2, ATP-binding cassette, sub-family B                  | TAP2              | 0.690490367 |
| tubulin-specific chaperone c                                       | TBCC              | 0.77313411  |

|                                                                |          |             |
|----------------------------------------------------------------|----------|-------------|
| TANK-binding kinase 1                                          | TBK1     | 0.777263836 |
| transforming growth factor beta 1 induced transcript 1         | TGFB11   | 0.750393069 |
| transforming growth factor, beta-induced, 68kDa                | TGFBI    | 0.74261492  |
| transforming growth factor, beta receptor associated protein 1 | TGFBRAP1 | 0.772041374 |
| transglutaminase 2, C polypeptide                              | TGM2     | 0.66802119  |
| THO complex 7 homolog (Drosophila)                             | THOC7    | 0.800640894 |
| thymus cell antigen 1, theta                                   | THY1     | 0.505043966 |
| translocase of inner mitochondrial membrane 17a                | TIMM17A  | 0.822625595 |
| tubulointerstitial nephritis antigen-like                      | TINAGL   | 1.741618798 |
| transmembrane BAX inhibitor motif containing 4                 | TMBIM4   | 0.827878554 |
| transmembrane emp24 protein transport domain containing 4      | TMED4    | 1.244137776 |
| transmembrane protein 106C                                     | TMEM106C | 0.752335489 |
| transmembrane protein 205                                      | TMEM205  | 0.686569388 |
| transmembrane protein 43                                       | TMEM43   | 1.24309307  |
| tenascin C                                                     | TNC      | 1.724978744 |
| troponin T2, cardiac                                           | TNNT2    | 1.332192226 |
| tensin 1                                                       | TNS1     | 0.619144157 |
| tropomyosin 2, beta                                            | TPM2     | 0.789141674 |
| translocated promoter region                                   | TPR      | 0.743019122 |
| Tnf receptor associated factor 4                               | TRAF4    | 1.251208791 |
| tribbles homolog 2 (Drosophila)                                | TRIB2    | 0.637328764 |
| transformation related protein 53                              | TRP53    | 1.349856947 |
| tissue specific transplantation antigen P35B                   | TSTA3    | 0.80570229  |
| tweety homolog 2 (Drosophila)                                  | TTYH2    | 0.655648064 |
| thioredoxin interacting protein                                | TXNIP    | 0.512081197 |
| thioredoxin-like 4A                                            | TXNL4A   | 1.236522838 |
| ubiquitin associated protein 2-like                            | UBAP2L   | 1.317177196 |
| ubiquitin-conjugating enzyme E2M (UBC12 homolog, yeast)        | UBE2M    | 1.207182997 |
| ubiquitin-conjugating enzyme E2 variant 1                      | UBE2V1   | 1.560719143 |
| UDP glycosyltransferase 1 family, polypeptide A10              | UGT1A10  | 0.632451377 |
| ubiquitin-like, containing PHD and RING finger domains 2       | UHRF2    | 1.626143974 |
| unc-5 homolog B (C. elegans)                                   | UNC5B    | 0.633265806 |
| UPF2 regulator of nonsense transcripts homolog (yeast)         | UPF2     | 0.624685155 |
| uridine phosphorylase 1                                        | UPP1     | 1.469560797 |
| unconventional SNARE in the ER 1 homolog (S. cerevisiae)       | USE1     | 0.701583061 |
| ubiquitously expressed transcript                              | UXT      | 0.805725811 |
| vesicle-associated membrane protein 3                          | VAMP3    | 1.270297619 |
| vasohibin 2                                                    | VASH2    | 0.800409134 |
| vesicle amine transport protein 1 homolog (T californica)      | VAT1     | 1.346516997 |
| vascular endothelial zinc finger 1                             | VEZF1    | 0.77144934  |
| vacuolar protein sorting 72                                    | VPS72    | 1.355157171 |
| whirlin                                                        | WHRN     | 0.761505533 |
| Wolf-Hirschhorn syndrome candidate 2                           | WHSC2    | 0.770791327 |
| xanthine dehydrogenase                                         | XDH      | 0.801231532 |
| exportin, tRNA (nuclear export receptor for tRNAs)             | XPOT     | 1.280877034 |
| zinc finger and BTB domain containing 20                       | ZBTB20   | 0.689898826 |
| zinc finger homeobox 3                                         | ZFHX3    | 0.724572271 |
| zinc finger, matrin-like                                       | ZFML     | 0.791604758 |
| zinc finger protein 148                                        | ZFP148   | 0.741588149 |
| zinc metalloproteinase, STE24 homolog (S. cerevisiae)          | ZMPSTE24 | 1.30486036  |
| zinc finger, MYND domain containing 11                         | ZMYND11  | 1.307665351 |
